# Supplementary material for: The genome assembly of the fungal pathogen Pyrenochaeta lycopersici from Single-Molecule Real-Time sequencing sheds new light on its biological complexity
Source: PLoS One. 2018 Jul 6;13(7):e0200217. doi: 10.1371/journal.pone.0200217 (PMC6034849; doi:10.1371/journal.pone.0200217)
Supplement: S5 Table — (XLSX) [file pone.0200217.s010.xlsx]

## Sheet: S5_Table
Supplementary Table S5. Major membrane transporter families domains in P. lycopersici (highlighted) and other 10 published genomes.
	AN	BG	CH	FO	LM	NC	PLY_ER1211	PLY_ER1518	PTT	PTR	PN
Major Facilitator Superfamily	264	36	334	359	150	114	297	301	181	189	231
ABC transporter	94	34	82	128	67	62	54	55	43	69	43
Note: AN, Aspergillus nidulans; BG, Blumeria graminis; CH, Colletotrichum higgisianum; FO, Fusarium oxysporum; LM, Leptosphaeria maculans; NC, Neurospora crassa; PLY_ER1211, Pyrenochaeta lycopersici ER1211; PLY_ER1518, Pyrenochaeta lycopersici ER1518; PTT, Pyrenophora teres; PTR, Pyrenophora tritici repentis; PN, Phaeospheria nodorum
