# Supplementary material for: The genome assembly of the fungal pathogen Pyrenochaeta lycopersici from Single-Molecule Real-Time sequencing sheds new light on its biological complexity
Source: PLoS One. 2018 Jul 6;13(7):e0200217. doi: 10.1371/journal.pone.0200217 (PMC6034849; doi:10.1371/journal.pone.0200217)
Supplement: S8 Table — (XLSX) [file pone.0200217.s013.xlsx]

## Sheet: S8_Table
Supplementary Table S8. OrthoMCL groups of P. lycopersici ER1518 and other 10 ascomycetes.
Accession	Taxon	OrthoMCL_Group_id
blu|BLU_CCU75625	Blumeria graminis	OG_1
blu|BLU_CCU76794	Blumeria graminis	OG_1
blu|BLU_CCU75752	Blumeria graminis	OG_1
blu|BLU_CCU75825	Blumeria graminis	OG_1
blu|BLU_CCU75829	Blumeria graminis	OG_1
blu|BLU_CCU76829	Blumeria graminis	OG_1
blu|BLU_CCU75921	Blumeria graminis	OG_1
blu|BLU_CCU76002	Blumeria graminis	OG_1
blu|BLU_CCU76024	Blumeria graminis	OG_1
blu|BLU_CCU81958	Blumeria graminis	OG_1
blu|BLU_CCU82316	Blumeria graminis	OG_1
blu|BLU_CCU82329	Blumeria graminis	OG_1
blu|BLU_CCU82336	Blumeria graminis	OG_1
blu|BLU_CCU82344	Blumeria graminis	OG_1
blu|BLU_CCU82345	Blumeria graminis	OG_1
blu|BLU_CCU76048	Blumeria graminis	OG_1
blu|BLU_CCU76057	Blumeria graminis	OG_1
blu|BLU_CCU76080	Blumeria graminis	OG_1
blu|BLU_CCU76306	Blumeria graminis	OG_1
blu|BLU_CCU76312	Blumeria graminis	OG_1
blu|BLU_CCU82233	Blumeria graminis	OG_1
blu|BLU_CCU82255	Blumeria graminis	OG_1
blu|BLU_CCU83035	Blumeria graminis	OG_1
blu|BLU_CCU83071	Blumeria graminis	OG_1
blu|BLU_CCU83070	Blumeria graminis	OG_1
blu|BLU_CCU82802	Blumeria graminis	OG_1
blu|BLU_CCU82804	Blumeria graminis	OG_1
blu|BLU_CCU81324	Blumeria graminis	OG_1
blu|BLU_CCU76923	Blumeria graminis	OG_1
blu|BLU_CCU81706	Blumeria graminis	OG_1
blu|BLU_CCU77131	Blumeria graminis	OG_1
blu|BLU_CCU77146	Blumeria graminis	OG_1
blu|BLU_CCU77259	Blumeria graminis	OG_1
blu|BLU_CCU79600	Blumeria graminis	OG_1
blu|BLU_CCU79601	Blumeria graminis	OG_1
blu|BLU_CCU79608	Blumeria graminis	OG_1
blu|BLU_CCU79643	Blumeria graminis	OG_1
blu|BLU_CCU82562	Blumeria graminis	OG_1
blu|BLU_CCU82619	Blumeria graminis	OG_1
blu|BLU_CCU82974	Blumeria graminis	OG_1
blu|BLU_CCU74565	Blumeria graminis	OG_1
blu|BLU_CCU74606	Blumeria graminis	OG_1
blu|BLU_CCU74637	Blumeria graminis	OG_1
blu|BLU_CCU74654	Blumeria graminis	OG_1
blu|BLU_CCU74663	Blumeria graminis	OG_1
blu|BLU_CCU74698	Blumeria graminis	OG_1
blu|BLU_CCU74721	Blumeria graminis	OG_1
blu|BLU_CCU74722	Blumeria graminis	OG_1
blu|BLU_CCU74744	Blumeria graminis	OG_1
blu|BLU_CCU74783	Blumeria graminis	OG_1
blu|BLU_CCU74820	Blumeria graminis	OG_1
blu|BLU_CCU74833	Blumeria graminis	OG_1
blu|BLU_CCU74876	Blumeria graminis	OG_1
blu|BLU_CCU75004	Blumeria graminis	OG_1
blu|BLU_CCU75075	Blumeria graminis	OG_1
blu|BLU_CCU75105	Blumeria graminis	OG_1
blu|BLU_CCU75117	Blumeria graminis	OG_1
blu|BLU_CCU75147	Blumeria graminis	OG_1
blu|BLU_CCU75148	Blumeria graminis	OG_1
blu|BLU_CCU82363	Blumeria graminis	OG_1
blu|BLU_CCU82365	Blumeria graminis	OG_1
blu|BLU_CCU76957	Blumeria graminis	OG_1
blu|BLU_CCU77044	Blumeria graminis	OG_1
blu|BLU_CCU77049	Blumeria graminis	OG_1
blu|BLU_CCU77105	Blumeria graminis	OG_1
blu|BLU_CCU77106	Blumeria graminis	OG_1
blu|BLU_CCU83218	Blumeria graminis	OG_1
blu|BLU_CCU83142	Blumeria graminis	OG_1
blu|BLU_CCU83143	Blumeria graminis	OG_1
blu|BLU_CCU82762	Blumeria graminis	OG_1
blu|BLU_CCU82768	Blumeria graminis	OG_1
blu|BLU_CCU83154	Blumeria graminis	OG_1
blu|BLU_CCU80600	Blumeria graminis	OG_1
blu|BLU_CCU81012	Blumeria graminis	OG_1
blu|BLU_CCU81056	Blumeria graminis	OG_1
blu|BLU_CCU80163	Blumeria graminis	OG_1
blu|BLU_CCU80384	Blumeria graminis	OG_1
blu|BLU_CCU80399	Blumeria graminis	OG_1
blu|BLU_CCU83106	Blumeria graminis	OG_1
blu|BLU_CCU79105	Blumeria graminis	OG_1
blu|BLU_CCU74241	Blumeria graminis	OG_1
blu|BLU_CCU74339	Blumeria graminis	OG_1
blu|BLU_CCU74341	Blumeria graminis	OG_1
blu|BLU_CCU82759	Blumeria graminis	OG_1
blu|BLU_CCU74390	Blumeria graminis	OG_1
blu|BLU_CCU82827	Blumeria graminis	OG_1
blu|BLU_CCU74429	Blumeria graminis	OG_1
blu|BLU_CCU82100	Blumeria graminis	OG_1
blu|BLU_CCU83205	Blumeria graminis	OG_1
blu|BLU_CCU83216	Blumeria graminis	OG_1
blu|BLU_CCU76350	Blumeria graminis	OG_1
blu|BLU_CCU76381	Blumeria graminis	OG_1
blu|BLU_CCU76400	Blumeria graminis	OG_1
blu|BLU_CCU82161	Blumeria graminis	OG_1
blu|BLU_CCU76455	Blumeria graminis	OG_1
blu|BLU_CCU76501	Blumeria graminis	OG_1
blu|BLU_CCU83181	Blumeria graminis	OG_1
blu|BLU_CCU76568	Blumeria graminis	OG_1
blu|BLU_CCU76569	Blumeria graminis	OG_1
blu|BLU_CCU82175	Blumeria graminis	OG_1
blu|BLU_CCU76612	Blumeria graminis	OG_1
blu|BLU_CCU76692	Blumeria graminis	OG_1
blu|BLU_CCU82525	Blumeria graminis	OG_1
blu|BLU_CCU82528	Blumeria graminis	OG_1
blu|BLU_CCU83037	Blumeria graminis	OG_1
blu|BLU_CCU77489	Blumeria graminis	OG_1
blu|BLU_CCU77525	Blumeria graminis	OG_1
blu|BLU_CCU82036	Blumeria graminis	OG_1
blu|BLU_CCU82820	Blumeria graminis	OG_1
blu|BLU_CCU81842	Blumeria graminis	OG_1
blu|BLU_CCU83161	Blumeria graminis	OG_1
blu|BLU_CCU78898	Blumeria graminis	OG_1
blu|BLU_CCU83007	Blumeria graminis	OG_1
blu|BLU_CCU78033	Blumeria graminis	OG_1
blu|BLU_CCU78149	Blumeria graminis	OG_1
blu|BLU_CCU78197	Blumeria graminis	OG_1
blu|BLU_CCU78249	Blumeria graminis	OG_1
blu|BLU_CCU78397	Blumeria graminis	OG_1
blu|BLU_CCU78481	Blumeria graminis	OG_1
blu|BLU_CCU78507	Blumeria graminis	OG_1
blu|BLU_CCU78526	Blumeria graminis	OG_1
blu|BLU_CCU82485	Blumeria graminis	OG_1
blu|BLU_CCU82510	Blumeria graminis	OG_1
blu|BLU_CCU83212	Blumeria graminis	OG_1
blu|BLU_CCU82299	Blumeria graminis	OG_1
blu|BLU_CCU82935	Blumeria graminis	OG_1
blu|BLU_CCU82937	Blumeria graminis	OG_1
blu|BLU_CCU75299	Blumeria graminis	OG_1
blu|BLU_CCU75356	Blumeria graminis	OG_1
blu|BLU_CCU75374	Blumeria graminis	OG_1
blu|BLU_CCU75383	Blumeria graminis	OG_1
blu|BLU_CCU75458	Blumeria graminis	OG_1
blu|BLU_CCU75528	Blumeria graminis	OG_1
blu|BLU_CCU76795	Blumeria graminis	OG_1
blu|BLU_CCU81531	Blumeria graminis	OG_1
blu|BLU_CCU81581	Blumeria graminis	OG_1
blu|BLU_CCU81597	Blumeria graminis	OG_1
blu|BLU_CCU75700	Blumeria graminis	OG_1
blu|BLU_CCU75773	Blumeria graminis	OG_1
blu|BLU_CCU75843	Blumeria graminis	OG_1
blu|BLU_CCU75964	Blumeria graminis	OG_1
blu|BLU_CCU76839	Blumeria graminis	OG_1
blu|BLU_CCU76840	Blumeria graminis	OG_1
blu|BLU_CCU76855	Blumeria graminis	OG_1
blu|BLU_CCU82354	Blumeria graminis	OG_1
blu|BLU_CCU76073	Blumeria graminis	OG_1
blu|BLU_CCU76199	Blumeria graminis	OG_1
blu|BLU_CCU76885	Blumeria graminis	OG_1
blu|BLU_CCU81259	Blumeria graminis	OG_1
blu|BLU_CCU81305	Blumeria graminis	OG_1
blu|BLU_CCU81382	Blumeria graminis	OG_1
blu|BLU_CCU77150	Blumeria graminis	OG_1
blu|BLU_CCU77218	Blumeria graminis	OG_1
blu|BLU_CCU79862	Blumeria graminis	OG_1
blu|BLU_CCU82565	Blumeria graminis	OG_1
blu|BLU_CCU82648	Blumeria graminis	OG_1
blu|BLU_CCU74484	Blumeria graminis	OG_1
blu|BLU_CCU74635	Blumeria graminis	OG_1
blu|BLU_CCU74643	Blumeria graminis	OG_1
blu|BLU_CCU74757	Blumeria graminis	OG_1
blu|BLU_CCU74898	Blumeria graminis	OG_1
blu|BLU_CCU75045	Blumeria graminis	OG_1
blu|BLU_CCU75047	Blumeria graminis	OG_1
blu|BLU_CCU75088	Blumeria graminis	OG_1
blu|BLU_CCU75204	Blumeria graminis	OG_1
blu|BLU_CCU82366	Blumeria graminis	OG_1
blu|BLU_CCU82367	Blumeria graminis	OG_1
blu|BLU_CCU77040	Blumeria graminis	OG_1
blu|BLU_CCU83240	Blumeria graminis	OG_1
blu|BLU_CCU83177	Blumeria graminis	OG_1
blu|BLU_CCU80797	Blumeria graminis	OG_1
blu|BLU_CCU81509	Blumeria graminis	OG_1
blu|BLU_CCU80318	Blumeria graminis	OG_1
blu|BLU_CCU80333	Blumeria graminis	OG_1
blu|BLU_CCU80372	Blumeria graminis	OG_1
blu|BLU_CCU82688	Blumeria graminis	OG_1
blu|BLU_CCU74189	Blumeria graminis	OG_1
blu|BLU_CCU74326	Blumeria graminis	OG_1
blu|BLU_CCU74459	Blumeria graminis	OG_1
blu|BLU_CCU77396	Blumeria graminis	OG_1
blu|BLU_CCU76348	Blumeria graminis	OG_1
blu|BLU_CCU76406	Blumeria graminis	OG_1
blu|BLU_CCU76422	Blumeria graminis	OG_1
blu|BLU_CCU76432	Blumeria graminis	OG_1
blu|BLU_CCU76431	Blumeria graminis	OG_1
blu|BLU_CCU76491	Blumeria graminis	OG_1
blu|BLU_CCU76502	Blumeria graminis	OG_1
blu|BLU_CCU76545	Blumeria graminis	OG_1
blu|BLU_CCU76686	Blumeria graminis	OG_1
blu|BLU_CCU77728	Blumeria graminis	OG_1
blu|BLU_CCU77808	Blumeria graminis	OG_1
blu|BLU_CCU81963	Blumeria graminis	OG_1
blu|BLU_CCU82025	Blumeria graminis	OG_1
blu|BLU_CCU82028	Blumeria graminis	OG_1
blu|BLU_CCU81803	Blumeria graminis	OG_1
blu|BLU_CCU78825	Blumeria graminis	OG_1
blu|BLU_CCU82055	Blumeria graminis	OG_1
blu|BLU_CCU82455	Blumeria graminis	OG_1
blu|BLU_CCU82456	Blumeria graminis	OG_1
blu|BLU_CCU82267	Blumeria graminis	OG_1
blu|BLU_CCU82305	Blumeria graminis	OG_1
blu|BLU_CCU83055	Blumeria graminis	OG_1
blu|BLU_CCU75243	Blumeria graminis	OG_1
blu|BLU_CCU75280	Blumeria graminis	OG_1
blu|BLU_CCU75313	Blumeria graminis	OG_1
blu|BLU_CCU75331	Blumeria graminis	OG_1
blu|BLU_CCU75342	Blumeria graminis	OG_1
blu|BLU_CCU75436	Blumeria graminis	OG_1
blu|BLU_CCU75437	Blumeria graminis	OG_1
blu|BLU_CCU75527	Blumeria graminis	OG_1
blu|BLU_CCU75951	Blumeria graminis	OG_1
blu|BLU_CCU80005	Blumeria graminis	OG_1
blu|BLU_CCU74714	Blumeria graminis	OG_1
blu|BLU_CCU77328	Blumeria graminis	OG_1
blu|BLU_CCU77574	Blumeria graminis	OG_1
blu|BLU_CCU82309	Blumeria graminis	OG_1
blu|BLU_CCU77048	Blumeria graminis	OG_1
blu|BLU_CCU76095	Blumeria graminis	OG_1
blu|BLU_CCU78771	Blumeria graminis	OG_1
blu|BLU_CCU77437	Blumeria graminis	OG_1
blu|BLU_CCU74294	Blumeria graminis	OG_1
blu|BLU_CCU82985	Blumeria graminis	OG_1
blu|BLU_CCU75842	Blumeria graminis	OG_1
blu|BLU_CCU81841	Blumeria graminis	OG_1
blu|BLU_CCU79164	Blumeria graminis	OG_1
blu|BLU_CCU74225	Blumeria graminis	OG_1
blu|BLU_CCU76392	Blumeria graminis	OG_1
blu|BLU_CCU82541	Blumeria graminis	OG_1
ptr|PTRG_EDU47282	Pyrenophora tritici-repentis	OG_1
blu|BLU_CCU75587	Blumeria graminis	OG_2
blu|BLU_CCU75588	Blumeria graminis	OG_2
blu|BLU_CCU81561	Blumeria graminis	OG_2
blu|BLU_CCU81590	Blumeria graminis	OG_2
blu|BLU_CCU75712	Blumeria graminis	OG_2
blu|BLU_CCU75736	Blumeria graminis	OG_2
blu|BLU_CCU75737	Blumeria graminis	OG_2
blu|BLU_CCU75772	Blumeria graminis	OG_2
blu|BLU_CCU75776	Blumeria graminis	OG_2
blu|BLU_CCU75920	Blumeria graminis	OG_2
blu|BLU_CCU75950	Blumeria graminis	OG_2
blu|BLU_CCU75957	Blumeria graminis	OG_2
blu|BLU_CCU75984	Blumeria graminis	OG_2
blu|BLU_CCU75986	Blumeria graminis	OG_2
blu|BLU_CCU82324	Blumeria graminis	OG_2
blu|BLU_CCU82327	Blumeria graminis	OG_2
blu|BLU_CCU82330	Blumeria graminis	OG_2
blu|BLU_CCU82335	Blumeria graminis	OG_2
blu|BLU_CCU82337	Blumeria graminis	OG_2
blu|BLU_CCU82339	Blumeria graminis	OG_2
blu|BLU_CCU82340	Blumeria graminis	OG_2
blu|BLU_CCU76068	Blumeria graminis	OG_2
blu|BLU_CCU76069	Blumeria graminis	OG_2
blu|BLU_CCU76070	Blumeria graminis	OG_2
blu|BLU_CCU76075	Blumeria graminis	OG_2
blu|BLU_CCU76076	Blumeria graminis	OG_2
blu|BLU_CCU76077	Blumeria graminis	OG_2
blu|BLU_CCU76078	Blumeria graminis	OG_2
blu|BLU_CCU76079	Blumeria graminis	OG_2
blu|BLU_CCU76149	Blumeria graminis	OG_2
blu|BLU_CCU76150	Blumeria graminis	OG_2
blu|BLU_CCU76151	Blumeria graminis	OG_2
blu|BLU_CCU76166	Blumeria graminis	OG_2
blu|BLU_CCU76176	Blumeria graminis	OG_2
blu|BLU_CCU76186	Blumeria graminis	OG_2
blu|BLU_CCU76187	Blumeria graminis	OG_2
blu|BLU_CCU82244	Blumeria graminis	OG_2
blu|BLU_CCU82248	Blumeria graminis	OG_2
blu|BLU_CCU82249	Blumeria graminis	OG_2
blu|BLU_CCU82252	Blumeria graminis	OG_2
blu|BLU_CCU82256	Blumeria graminis	OG_2
blu|BLU_CCU81266	Blumeria graminis	OG_2
blu|BLU_CCU81268	Blumeria graminis	OG_2
blu|BLU_CCU81272	Blumeria graminis	OG_2
blu|BLU_CCU81294	Blumeria graminis	OG_2
blu|BLU_CCU81310	Blumeria graminis	OG_2
blu|BLU_CCU81318	Blumeria graminis	OG_2
blu|BLU_CCU81363	Blumeria graminis	OG_2
blu|BLU_CCU81364	Blumeria graminis	OG_2
blu|BLU_CCU81365	Blumeria graminis	OG_2
blu|BLU_CCU81383	Blumeria graminis	OG_2
blu|BLU_CCU81384	Blumeria graminis	OG_2
blu|BLU_CCU81387	Blumeria graminis	OG_2
blu|BLU_CCU81388	Blumeria graminis	OG_2
blu|BLU_CCU81389	Blumeria graminis	OG_2
blu|BLU_CCU81390	Blumeria graminis	OG_2
blu|BLU_CCU81391	Blumeria graminis	OG_2
blu|BLU_CCU81670	Blumeria graminis	OG_2
blu|BLU_CCU81671	Blumeria graminis	OG_2
blu|BLU_CCU83262	Blumeria graminis	OG_2
blu|BLU_CCU79582	Blumeria graminis	OG_2
blu|BLU_CCU79584	Blumeria graminis	OG_2
blu|BLU_CCU79590	Blumeria graminis	OG_2
blu|BLU_CCU79595	Blumeria graminis	OG_2
blu|BLU_CCU79596	Blumeria graminis	OG_2
blu|BLU_CCU79597	Blumeria graminis	OG_2
blu|BLU_CCU79602	Blumeria graminis	OG_2
blu|BLU_CCU79603	Blumeria graminis	OG_2
blu|BLU_CCU79735	Blumeria graminis	OG_2
blu|BLU_CCU79778	Blumeria graminis	OG_2
blu|BLU_CCU74685	Blumeria graminis	OG_2
blu|BLU_CCU74831	Blumeria graminis	OG_2
blu|BLU_CCU74872	Blumeria graminis	OG_2
blu|BLU_CCU74917	Blumeria graminis	OG_2
blu|BLU_CCU74924	Blumeria graminis	OG_2
blu|BLU_CCU74997	Blumeria graminis	OG_2
blu|BLU_CCU74999	Blumeria graminis	OG_2
blu|BLU_CCU82395	Blumeria graminis	OG_2
blu|BLU_CCU82396	Blumeria graminis	OG_2
blu|BLU_CCU82397	Blumeria graminis	OG_2
blu|BLU_CCU82398	Blumeria graminis	OG_2
blu|BLU_CCU82772	Blumeria graminis	OG_2
blu|BLU_CCU83188	Blumeria graminis	OG_2
blu|BLU_CCU80371	Blumeria graminis	OG_2
blu|BLU_CCU80377	Blumeria graminis	OG_2
blu|BLU_CCU80386	Blumeria graminis	OG_2
blu|BLU_CCU82585	Blumeria graminis	OG_2
blu|BLU_CCU79044	Blumeria graminis	OG_2
blu|BLU_CCU79062	Blumeria graminis	OG_2
blu|BLU_CCU79135	Blumeria graminis	OG_2
blu|BLU_CCU82729	Blumeria graminis	OG_2
blu|BLU_CCU79289	Blumeria graminis	OG_2
blu|BLU_CCU79287	Blumeria graminis	OG_2
blu|BLU_CCU79530	Blumeria graminis	OG_2
blu|BLU_CCU79532	Blumeria graminis	OG_2
blu|BLU_CCU79543	Blumeria graminis	OG_2
blu|BLU_CCU82113	Blumeria graminis	OG_2
blu|BLU_CCU82856	Blumeria graminis	OG_2
blu|BLU_CCU82857	Blumeria graminis	OG_2
blu|BLU_CCU82864	Blumeria graminis	OG_2
blu|BLU_CCU76353	Blumeria graminis	OG_2
blu|BLU_CCU76360	Blumeria graminis	OG_2
blu|BLU_CCU76482	Blumeria graminis	OG_2
blu|BLU_CCU76483	Blumeria graminis	OG_2
blu|BLU_CCU76490	Blumeria graminis	OG_2
blu|BLU_CCU76492	Blumeria graminis	OG_2
blu|BLU_CCU76505	Blumeria graminis	OG_2
blu|BLU_CCU83285	Blumeria graminis	OG_2
blu|BLU_CCU82543	Blumeria graminis	OG_2
blu|BLU_CCU82546	Blumeria graminis	OG_2
blu|BLU_CCU82550	Blumeria graminis	OG_2
blu|BLU_CCU83017	Blumeria graminis	OG_2
blu|BLU_CCU83018	Blumeria graminis	OG_2
blu|BLU_CCU82061	Blumeria graminis	OG_2
blu|BLU_CCU78322	Blumeria graminis	OG_2
blu|BLU_CCU82080	Blumeria graminis	OG_2
blu|BLU_CCU78442	Blumeria graminis	OG_2
blu|BLU_CCU82512	Blumeria graminis	OG_2
blu|BLU_CCU83068	Blumeria graminis	OG_2
blu|BLU_CCU75240	Blumeria graminis	OG_2
blu|BLU_CCU75241	Blumeria graminis	OG_2
blu|BLU_CCU75242	Blumeria graminis	OG_2
blu|BLU_CCU75489	Blumeria graminis	OG_2
blu|BLU_CCU75514	Blumeria graminis	OG_2
blu|BLU_CCU75522	Blumeria graminis	OG_2
blu|BLU_CCU75521	Blumeria graminis	OG_2
blu|BLU_CCU75524	Blumeria graminis	OG_2
blu|BLU_CCU75525	Blumeria graminis	OG_2
blu|BLU_CCU75529	Blumeria graminis	OG_2
blu|BLU_CCU75530	Blumeria graminis	OG_2
blu|BLU_CCU75531	Blumeria graminis	OG_2
blu|BLU_CCU75535	Blumeria graminis	OG_2
blu|BLU_CCU75536	Blumeria graminis	OG_2
blu|BLU_CCU75952	Blumeria graminis	OG_2
blu|BLU_CCU75972	Blumeria graminis	OG_2
blu|BLU_CCU81269	Blumeria graminis	OG_2
blu|BLU_CCU79050	Blumeria graminis	OG_2
blu|BLU_CCU83256	Blumeria graminis	OG_2
blu|BLU_CCU77955	Blumeria graminis	OG_2
blu|BLU_CCU82517	Blumeria graminis	OG_2
blu|BLU_CCU81641	Blumeria graminis	OG_2
blu|BLU_CCU77192	Blumeria graminis	OG_2
blu|BLU_CCU74925	Blumeria graminis	OG_2
blu|BLU_CCU75761	Blumeria graminis	OG_2
blu|BLU_CCU79090	Blumeria graminis	OG_2
blu|BLU_CCU77324	Blumeria graminis	OG_2
blu|BLU_CCU80391	Blumeria graminis	OG_2
blu|BLU_CCU78589	Blumeria graminis	OG_2
blu|BLU_CCU82331	Blumeria graminis	OG_2
blu|BLU_CCU76161	Blumeria graminis	OG_2
blu|BLU_CCU76152	Blumeria graminis	OG_2
blu|BLU_CCU77222	Blumeria graminis	OG_2
blu|BLU_CCU75517	Blumeria graminis	OG_2
blu|BLU_CCU79088	Blumeria graminis	OG_2
blu|BLU_CCU75518	Blumeria graminis	OG_2
asp|ASP_CADANIAP00007586	Aspergillus nidulans	OG_3
asp|ASP_CADANIAP00007957	Aspergillus nidulans	OG_3
asp|ASP_CADANIAP00008431	Aspergillus nidulans	OG_3
asp|ASP_CADANIAP00008703	Aspergillus nidulans	OG_3
asp|ASP_CADANIAP00009277	Aspergillus nidulans	OG_3
asp|ASP_CADANIAP00009378	Aspergillus nidulans	OG_3
asp|ASP_CADANIAP00009787	Aspergillus nidulans	OG_3
asp|ASP_CADANIAP00005130	Aspergillus nidulans	OG_3
asp|ASP_CADANIAP00005132	Aspergillus nidulans	OG_3
asp|ASP_CADANIAP00001610	Aspergillus nidulans	OG_3
asp|ASP_CADANIAP00002886	Aspergillus nidulans	OG_3
asp|ASP_CADANIAP00006547	Aspergillus nidulans	OG_3
asp|ASP_CADANIAP00007849	Aspergillus nidulans	OG_3
asp|ASP_CADANIAP00000983	Aspergillus nidulans	OG_3
Plyc_ER1211|10221_g	Pyrenochaeta lycopersici type 2	OG_3
Plyc_ER1211|8120_g	Pyrenochaeta lycopersici type 2	OG_3
Plyc_ER1211|12849_g	Pyrenochaeta lycopersici type 2	OG_3
Plyc_ER1211|7110_g	Pyrenochaeta lycopersici type 2	OG_3
Plyc_ER1211|13135_g	Pyrenochaeta lycopersici type 2	OG_3
Plyc_ER1211|6039_g	Pyrenochaeta lycopersici type 2	OG_3
col|COL_CCF39154	Colletothricum higghisianum	OG_3
col|COL_CCF44858	Colletothricum higghisianum	OG_3
col|COL_CCF37523	Colletothricum higghisianum	OG_3
col|COL_CCF36927	Colletothricum higghisianum	OG_3
col|COL_CCF35523	Colletothricum higghisianum	OG_3
col|COL_CCF33634	Colletothricum higghisianum	OG_3
col|COL_CCF47625	Colletothricum higghisianum	OG_3
col|COL_CCF32733	Colletothricum higghisianum	OG_3
col|COL_CCF32840	Colletothricum higghisianum	OG_3
col|COL_CCF35613	Colletothricum higghisianum	OG_3
col|COL_CCF38809	Colletothricum higghisianum	OG_3
col|COL_CCF44301	Colletothricum higghisianum	OG_3
col|COL_CCF38812	Colletothricum higghisianum	OG_3
col|COL_CCF43411	Colletothricum higghisianum	OG_3
col|COL_CCF32519	Colletothricum higghisianum	OG_3
col|COL_CCF39376	Colletothricum higghisianum	OG_3
col|COL_CCF33502	Colletothricum higghisianum	OG_3
col|COL_CCF42645	Colletothricum higghisianum	OG_3
col|COL_CCF33226	Colletothricum higghisianum	OG_3
col|COL_CCF36189	Colletothricum higghisianum	OG_3
col|COL_CCF34702	Colletothricum higghisianum	OG_3
col|COL_CCF36705	Colletothricum higghisianum	OG_3
col|COL_CCF37388	Colletothricum higghisianum	OG_3
col|COL_CCF46685	Colletothricum higghisianum	OG_3
col|COL_CCF44299	Colletothricum higghisianum	OG_3
col|COL_CCF37923	Colletothricum higghisianum	OG_3
fus|FUS_FOXG_14850P0	Fusarium oxysporum sp. lycopersici	OG_3
fus|FUS_FOXG_02741P0	Fusarium oxysporum sp. lycopersici	OG_3
fus|FUS_FOXG_15886P0	Fusarium oxysporum sp. lycopersici	OG_3
fus|FUS_FOXG_11892P0	Fusarium oxysporum sp. lycopersici	OG_3
fus|FUS_FOXG_14587P0	Fusarium oxysporum sp. lycopersici	OG_3
fus|FUS_FOXG_15296P0	Fusarium oxysporum sp. lycopersici	OG_3
fus|FUS_FOXG_03051P0	Fusarium oxysporum sp. lycopersici	OG_3
fus|FUS_FOXG_03945P0	Fusarium oxysporum sp. lycopersici	OG_3
fus|FUS_FOXG_11954P0	Fusarium oxysporum sp. lycopersici	OG_3
fus|FUS_FOXG_10805P0	Fusarium oxysporum sp. lycopersici	OG_3
fus|FUS_FOXG_15248P0	Fusarium oxysporum sp. lycopersici	OG_3
lep|LEP_CBX90731	Leptosphaeria maculans	OG_3
lep|LEP_CBX99534	Leptosphaeria maculans	OG_3
lep|LEP_CBY01874	Leptosphaeria maculans	OG_3
lep|LEP_CBX98992	Leptosphaeria maculans	OG_3
lep|LEP_CBX90738	Leptosphaeria maculans	OG_3
lep|LEP_CBY01479	Leptosphaeria maculans	OG_3
lep|LEP_CBX94794	Leptosphaeria maculans	OG_3
lep|LEP_CBY00601	Leptosphaeria maculans	OG_3
lep|LEP_CBY01295	Leptosphaeria maculans	OG_3
neu|NEU_EFNCRP00000001401	Neurospora crassa	OG_3
neu|NEU_EFNCRP00000001392	Neurospora crassa	OG_3
neu|NEU_EFNCRP00000002314	Neurospora crassa	OG_3
neu|NEU_EFNCRP00000004843	Neurospora crassa	OG_3
neu|NEU_EFNCRP00000007812	Neurospora crassa	OG_3
neu|NEU_EFNCRP00000009377	Neurospora crassa	OG_3
pha|PHA_SNOT_14927	Phaeospheria nodorum	OG_3
pha|PHA_SNOT_09623	Phaeospheria nodorum	OG_3
pha|PHA_SNOT_11076	Phaeospheria nodorum	OG_3
pha|PHA_SNOT_02561	Phaeospheria nodorum	OG_3
pha|PHA_SNOT_05791	Phaeospheria nodorum	OG_3
pha|PHA_SNOT_00308	Phaeospheria nodorum	OG_3
pha|PHA_SNOT_07866	Phaeospheria nodorum	OG_3
pha|PHA_SNOT_04868	Phaeospheria nodorum	OG_3
pha|PHA_SNOT_13032	Phaeospheria nodorum	OG_3
ptr|PTRG_EDU46521	Pyrenophora tritici-repentis	OG_3
ptr|PTRG_EDU46982	Pyrenophora tritici-repentis	OG_3
ptr|PTRG_EDU47225	Pyrenophora tritici-repentis	OG_3
ptr|PTRG_EDU47346	Pyrenophora tritici-repentis	OG_3
ptr|PTRG_EDU49219	Pyrenophora tritici-repentis	OG_3
ptr|PTRG_EDU49723	Pyrenophora tritici-repentis	OG_3
ptr|PTRG_EDU39548	Pyrenophora tritici-repentis	OG_3
ptr|PTRG_EDU42159	Pyrenophora tritici-repentis	OG_3
ptr|PTRG_EDU46789	Pyrenophora tritici-repentis	OG_3
ptr|PTRG_EDU47082	Pyrenophora tritici-repentis	OG_3
ptr|PTRG_EDU46180	Pyrenophora tritici-repentis	OG_3
ptr|PTRG_EDU45986	Pyrenophora tritici-repentis	OG_3
ptt|PTT_EFQ85729	Pyrenophora teres	OG_3
ptt|PTT_EFQ87243	Pyrenophora teres	OG_3
ptt|PTT_EFQ92956	Pyrenophora teres	OG_3
ptt|PTT_EFQ85730	Pyrenophora teres	OG_3
ptt|PTT_EFQ90138	Pyrenophora teres	OG_3
ptt|PTT_EFQ92322	Pyrenophora teres	OG_3
ptt|PTT_EFQ91289	Pyrenophora teres	OG_3
ptt|PTT_EFQ94415	Pyrenophora teres	OG_3
ptt|PTT_EFQ93721	Pyrenophora teres	OG_3
ptt|PTT_EFQ86427	Pyrenophora teres	OG_3
ptt|PTT_EFQ90137	Pyrenophora teres	OG_3
ptt|PTT_EFQ88351	Pyrenophora teres	OG_3
ptt|PTT_EFQ85105	Pyrenophora teres	OG_3
ptt|PTT_EFQ95051	Pyrenophora teres	OG_3
ptt|PTT_EFQ92739	Pyrenophora teres	OG_3
ptt|PTT_EFQ89733	Pyrenophora teres	OG_3
ptt|PTT_EFQ87497	Pyrenophora teres	OG_3
ptt|PTT_EFQ88531	Pyrenophora teres	OG_3
Plyc_ER1518|13637_g	Pyrenochaeta lycopersici	OG_3
Plyc_ER1518|14204_g	Pyrenochaeta lycopersici	OG_3
Plyc_ER1518|16894_g	Pyrenochaeta lycopersici	OG_3
Plyc_ER1518|1971_g	Pyrenochaeta lycopersici	OG_3
Plyc_ER1211|7487_g	Pyrenochaeta lycopersici type 2	OG_3
Plyc_ER1518|12936_g	Pyrenochaeta lycopersici	OG_3
Plyc_ER1211|7459_g	Pyrenochaeta lycopersici type 2	OG_3
pha|PHA_SNOT_11272	Phaeospheria nodorum	OG_3
pha|PHA_SNOT_12897	Phaeospheria nodorum	OG_3
asp|ASP_CADANIAP00000383	Aspergillus nidulans	OG_3
pha|PHA_SNOT_15965	Phaeospheria nodorum	OG_3
Plyc_ER1211|12398_g	Pyrenochaeta lycopersici type 2	OG_3
Plyc_ER1518|9372_g	Pyrenochaeta lycopersici	OG_3
col|COL_CCF34116	Colletothricum higghisianum	OG_3
col|COL_CCF40190	Colletothricum higghisianum	OG_3
Plyc_ER1211|13112_g	Pyrenochaeta lycopersici type 2	OG_3
pha|PHA_SNOT_11066	Phaeospheria nodorum	OG_3
Plyc_ER1211|1956_g	Pyrenochaeta lycopersici type 2	OG_3
Plyc_ER1211|5582_g	Pyrenochaeta lycopersici type 2	OG_3
col|COL_CCF40703	Colletothricum higghisianum	OG_3
col|COL_CCF42916	Colletothricum higghisianum	OG_3
col|COL_CCF43328	Colletothricum higghisianum	OG_3
col|COL_CCF45328	Colletothricum higghisianum	OG_3
col|COL_CCF46697	Colletothricum higghisianum	OG_3
col|COL_CCF40796	Colletothricum higghisianum	OG_3
col|COL_CCF44055	Colletothricum higghisianum	OG_3
fus|FUS_FOXG_02884P0	Fusarium oxysporum sp. lycopersici	OG_3
col|COL_CCF41658	Colletothricum higghisianum	OG_3
ptr|PTRG_EDU45985	Pyrenophora tritici-repentis	OG_3
ptr|PTRG_EDU46125	Pyrenophora tritici-repentis	OG_3
fus|FUS_FOXG_12590P0	Fusarium oxysporum sp. lycopersici	OG_4
fus|FUS_FOXG_16134P0	Fusarium oxysporum sp. lycopersici	OG_4
fus|FUS_FOXG_16168P0	Fusarium oxysporum sp. lycopersici	OG_4
fus|FUS_FOXG_16174P0	Fusarium oxysporum sp. lycopersici	OG_4
fus|FUS_FOXG_16187P0	Fusarium oxysporum sp. lycopersici	OG_4
fus|FUS_FOXG_06535P0	Fusarium oxysporum sp. lycopersici	OG_4
fus|FUS_FOXG_06545P0	Fusarium oxysporum sp. lycopersici	OG_4
fus|FUS_FOXG_06553P0	Fusarium oxysporum sp. lycopersici	OG_4
fus|FUS_FOXG_06587P0	Fusarium oxysporum sp. lycopersici	OG_4
fus|FUS_FOXG_06672P0	Fusarium oxysporum sp. lycopersici	OG_4
fus|FUS_FOXG_06709P0	Fusarium oxysporum sp. lycopersici	OG_4
fus|FUS_FOXG_06721P0	Fusarium oxysporum sp. lycopersici	OG_4
fus|FUS_FOXG_06732P0	Fusarium oxysporum sp. lycopersici	OG_4
fus|FUS_FOXG_06816P0	Fusarium oxysporum sp. lycopersici	OG_4
fus|FUS_FOXG_06824P0	Fusarium oxysporum sp. lycopersici	OG_4
fus|FUS_FOXG_06837P0	Fusarium oxysporum sp. lycopersici	OG_4
fus|FUS_FOXG_06843P0	Fusarium oxysporum sp. lycopersici	OG_4
fus|FUS_FOXG_06876P0	Fusarium oxysporum sp. lycopersici	OG_4
fus|FUS_FOXG_14855P0	Fusarium oxysporum sp. lycopersici	OG_4
fus|FUS_FOXG_14933P0	Fusarium oxysporum sp. lycopersici	OG_4
fus|FUS_FOXG_14974P0	Fusarium oxysporum sp. lycopersici	OG_4
fus|FUS_FOXG_06950P0	Fusarium oxysporum sp. lycopersici	OG_4
fus|FUS_FOXG_07009P0	Fusarium oxysporum sp. lycopersici	OG_4
fus|FUS_FOXG_07037P0	Fusarium oxysporum sp. lycopersici	OG_4
fus|FUS_FOXG_07088P0	Fusarium oxysporum sp. lycopersici	OG_4
fus|FUS_FOXG_07090P0	Fusarium oxysporum sp. lycopersici	OG_4
fus|FUS_FOXG_07155P0	Fusarium oxysporum sp. lycopersici	OG_4
fus|FUS_FOXG_07239P0	Fusarium oxysporum sp. lycopersici	OG_4
fus|FUS_FOXG_07273P0	Fusarium oxysporum sp. lycopersici	OG_4
fus|FUS_FOXG_07281P0	Fusarium oxysporum sp. lycopersici	OG_4
fus|FUS_FOXG_07290P0	Fusarium oxysporum sp. lycopersici	OG_4
fus|FUS_FOXG_16193P0	Fusarium oxysporum sp. lycopersici	OG_4
fus|FUS_FOXG_16206P0	Fusarium oxysporum sp. lycopersici	OG_4
fus|FUS_FOXG_16212P0	Fusarium oxysporum sp. lycopersici	OG_4
fus|FUS_FOXG_16244P0	Fusarium oxysporum sp. lycopersici	OG_4
fus|FUS_FOXG_14133P0	Fusarium oxysporum sp. lycopersici	OG_4
fus|FUS_FOXG_09996P0	Fusarium oxysporum sp. lycopersici	OG_4
fus|FUS_FOXG_11909P0	Fusarium oxysporum sp. lycopersici	OG_4
fus|FUS_FOXG_14263P0	Fusarium oxysporum sp. lycopersici	OG_4
fus|FUS_FOXG_14300P0	Fusarium oxysporum sp. lycopersici	OG_4
fus|FUS_FOXG_16412P0	Fusarium oxysporum sp. lycopersici	OG_4
fus|FUS_FOXG_16758P0	Fusarium oxysporum sp. lycopersici	OG_4
fus|FUS_FOXG_14398P0	Fusarium oxysporum sp. lycopersici	OG_4
fus|FUS_FOXG_14416P0	Fusarium oxysporum sp. lycopersici	OG_4
fus|FUS_FOXG_14475P0	Fusarium oxysporum sp. lycopersici	OG_4
fus|FUS_FOXG_14479P0	Fusarium oxysporum sp. lycopersici	OG_4
fus|FUS_FOXG_16314P0	Fusarium oxysporum sp. lycopersici	OG_4
fus|FUS_FOXG_17275P0	Fusarium oxysporum sp. lycopersici	OG_4
fus|FUS_FOXG_17468P0	Fusarium oxysporum sp. lycopersici	OG_4
fus|FUS_FOXG_15001P0	Fusarium oxysporum sp. lycopersici	OG_4
fus|FUS_FOXG_15005P0	Fusarium oxysporum sp. lycopersici	OG_4
fus|FUS_FOXG_15065P0	Fusarium oxysporum sp. lycopersici	OG_4
fus|FUS_FOXG_15082P0	Fusarium oxysporum sp. lycopersici	OG_4
fus|FUS_FOXG_07453P0	Fusarium oxysporum sp. lycopersici	OG_4
fus|FUS_FOXG_07480P0	Fusarium oxysporum sp. lycopersici	OG_4
fus|FUS_FOXG_04643P0	Fusarium oxysporum sp. lycopersici	OG_4
fus|FUS_FOXG_08825P0	Fusarium oxysporum sp. lycopersici	OG_4
fus|FUS_FOXG_12403P0	Fusarium oxysporum sp. lycopersici	OG_4
fus|FUS_FOXG_06988P0	Fusarium oxysporum sp. lycopersici	OG_4
fus|FUS_FOXG_16693P0	Fusarium oxysporum sp. lycopersici	OG_4
fus|FUS_FOXG_14461P0	Fusarium oxysporum sp. lycopersici	OG_4
fus|FUS_FOXG_16055P0	Fusarium oxysporum sp. lycopersici	OG_4
fus|FUS_FOXG_15019P0	Fusarium oxysporum sp. lycopersici	OG_4
fus|FUS_FOXG_17311P0	Fusarium oxysporum sp. lycopersici	OG_4
fus|FUS_FOXG_12540P0	Fusarium oxysporum sp. lycopersici	OG_4
fus|FUS_FOXG_16167P0	Fusarium oxysporum sp. lycopersici	OG_4
fus|FUS_FOXG_06470P0	Fusarium oxysporum sp. lycopersici	OG_4
fus|FUS_FOXG_06519P0	Fusarium oxysporum sp. lycopersici	OG_4
fus|FUS_FOXG_06536P0	Fusarium oxysporum sp. lycopersici	OG_4
fus|FUS_FOXG_06650P0	Fusarium oxysporum sp. lycopersici	OG_4
fus|FUS_FOXG_06731P0	Fusarium oxysporum sp. lycopersici	OG_4
fus|FUS_FOXG_06745P0	Fusarium oxysporum sp. lycopersici	OG_4
fus|FUS_FOXG_06791P0	Fusarium oxysporum sp. lycopersici	OG_4
fus|FUS_FOXG_06844P0	Fusarium oxysporum sp. lycopersici	OG_4
fus|FUS_FOXG_07034P0	Fusarium oxysporum sp. lycopersici	OG_4
fus|FUS_FOXG_07106P0	Fusarium oxysporum sp. lycopersici	OG_4
fus|FUS_FOXG_07121P0	Fusarium oxysporum sp. lycopersici	OG_4
fus|FUS_FOXG_07289P0	Fusarium oxysporum sp. lycopersici	OG_4
fus|FUS_FOXG_07305P0	Fusarium oxysporum sp. lycopersici	OG_4
fus|FUS_FOXG_07353P0	Fusarium oxysporum sp. lycopersici	OG_4
fus|FUS_FOXG_16213P0	Fusarium oxysporum sp. lycopersici	OG_4
fus|FUS_FOXG_14291P0	Fusarium oxysporum sp. lycopersici	OG_4
fus|FUS_FOXG_16422P0	Fusarium oxysporum sp. lycopersici	OG_4
fus|FUS_FOXG_14474P0	Fusarium oxysporum sp. lycopersici	OG_4
fus|FUS_FOXG_15599P0	Fusarium oxysporum sp. lycopersici	OG_4
fus|FUS_FOXG_16313P0	Fusarium oxysporum sp. lycopersici	OG_4
fus|FUS_FOXG_16331P0	Fusarium oxysporum sp. lycopersici	OG_4
fus|FUS_FOXG_16377P0	Fusarium oxysporum sp. lycopersici	OG_4
fus|FUS_FOXG_17277P0	Fusarium oxysporum sp. lycopersici	OG_4
fus|FUS_FOXG_17651P0	Fusarium oxysporum sp. lycopersici	OG_4
fus|FUS_FOXG_15006P0	Fusarium oxysporum sp. lycopersici	OG_4
fus|FUS_FOXG_04020P0	Fusarium oxysporum sp. lycopersici	OG_4
fus|FUS_FOXG_16173P0	Fusarium oxysporum sp. lycopersici	OG_4
fus|FUS_FOXG_06838P0	Fusarium oxysporum sp. lycopersici	OG_4
fus|FUS_FOXG_16207P0	Fusarium oxysporum sp. lycopersici	OG_4
fus|FUS_FOXG_14139P0	Fusarium oxysporum sp. lycopersici	OG_4
fus|FUS_FOXG_15564P0	Fusarium oxysporum sp. lycopersici	OG_4
fus|FUS_FOXG_16022P0	Fusarium oxysporum sp. lycopersici	OG_4
fus|FUS_FOXG_14437P0	Fusarium oxysporum sp. lycopersici	OG_4
fus|FUS_FOXG_15044P0	Fusarium oxysporum sp. lycopersici	OG_4
fus|FUS_FOXG_17310P0	Fusarium oxysporum sp. lycopersici	OG_4
fus|FUS_FOXG_07011P0	Fusarium oxysporum sp. lycopersici	OG_4
fus|FUS_FOXG_06498P0	Fusarium oxysporum sp. lycopersici	OG_4
fus|FUS_FOXG_06764P0	Fusarium oxysporum sp. lycopersici	OG_4
fus|FUS_FOXG_07326P0	Fusarium oxysporum sp. lycopersici	OG_4
fus|FUS_FOXG_16352P0	Fusarium oxysporum sp. lycopersici	OG_4
fus|FUS_FOXG_07047P0	Fusarium oxysporum sp. lycopersici	OG_4
fus|FUS_FOXG_14972P0	Fusarium oxysporum sp. lycopersici	OG_4
fus|FUS_FOXG_12978P0	Fusarium oxysporum sp. lycopersici	OG_4
ptt|PTT_EFQ89361	Pyrenophora teres	OG_4
ptt|PTT_EFQ94932	Pyrenophora teres	OG_4
ptt|PTT_EFQ91045	Pyrenophora teres	OG_4
ptt|PTT_EFQ94797	Pyrenophora teres	OG_4
ptt|PTT_EFQ89760	Pyrenophora teres	OG_4
ptt|PTT_EFQ89762	Pyrenophora teres	OG_4
ptt|PTT_EFQ91046	Pyrenophora teres	OG_4
ptt|PTT_EFQ91047	Pyrenophora teres	OG_4
ptt|PTT_EFQ89716	Pyrenophora teres	OG_4
asp|ASP_CADANIAP00002790	Aspergillus nidulans	OG_4
Plyc_ER1211|14495_g	Pyrenochaeta lycopersici type 2	OG_4
Plyc_ER1211|3266_g	Pyrenochaeta lycopersici type 2	OG_4
pha|PHA_SNOT_16572	Phaeospheria nodorum	OG_4
col|COL_CCF39628	Colletothricum higghisianum	OG_4
ptr|PTRG_EDU48789	Pyrenophora tritici-repentis	OG_4
ptr|PTRG_EDU43653	Pyrenophora tritici-repentis	OG_4
asp|ASP_CADANIAP00009275	Aspergillus nidulans	OG_5
asp|ASP_CADANIAP00010505	Aspergillus nidulans	OG_5
asp|ASP_CADANIAP00003901	Aspergillus nidulans	OG_5
asp|ASP_CADANIAP00005261	Aspergillus nidulans	OG_5
asp|ASP_CADANIAP00001381	Aspergillus nidulans	OG_5
asp|ASP_CADANIAP00002068	Aspergillus nidulans	OG_5
asp|ASP_CADANIAP00002742	Aspergillus nidulans	OG_5
asp|ASP_CADANIAP00006758	Aspergillus nidulans	OG_5
asp|ASP_CADANIAP00005262	Aspergillus nidulans	OG_5
asp|ASP_CADANIAP00005791	Aspergillus nidulans	OG_5
asp|ASP_CADANIAP00001010	Aspergillus nidulans	OG_5
Plyc_ER1211|10043_g	Pyrenochaeta lycopersici type 2	OG_5
Plyc_ER1211|13159_g	Pyrenochaeta lycopersici type 2	OG_5
Plyc_ER1211|13359_g	Pyrenochaeta lycopersici type 2	OG_5
Plyc_ER1211|8991_g	Pyrenochaeta lycopersici type 2	OG_5
Plyc_ER1211|8797_g	Pyrenochaeta lycopersici type 2	OG_5
col|COL_CCF39305	Colletothricum higghisianum	OG_5
col|COL_CCF42034	Colletothricum higghisianum	OG_5
col|COL_CCF35240	Colletothricum higghisianum	OG_5
col|COL_CCF35241	Colletothricum higghisianum	OG_5
col|COL_CCF39358	Colletothricum higghisianum	OG_5
col|COL_CCF33212	Colletothricum higghisianum	OG_5
col|COL_CCF43383	Colletothricum higghisianum	OG_5
col|COL_CCF42093	Colletothricum higghisianum	OG_5
col|COL_CCF36003	Colletothricum higghisianum	OG_5
col|COL_CCF41962	Colletothricum higghisianum	OG_5
col|COL_CCF34993	Colletothricum higghisianum	OG_5
col|COL_CCF42502	Colletothricum higghisianum	OG_5
fus|FUS_FOXG_10932P0	Fusarium oxysporum sp. lycopersici	OG_5
fus|FUS_FOXG_11967P0	Fusarium oxysporum sp. lycopersici	OG_5
fus|FUS_FOXG_13024P0	Fusarium oxysporum sp. lycopersici	OG_5
fus|FUS_FOXG_09785P0	Fusarium oxysporum sp. lycopersici	OG_5
lep|LEP_CBX99700	Leptosphaeria maculans	OG_5
lep|LEP_CBX99731	Leptosphaeria maculans	OG_5
lep|LEP_CBX91560	Leptosphaeria maculans	OG_5
lep|LEP_CBY02117	Leptosphaeria maculans	OG_5
lep|LEP_CBX99701	Leptosphaeria maculans	OG_5
pha|PHA_SNOT_14098	Phaeospheria nodorum	OG_5
pha|PHA_SNOT_14834	Phaeospheria nodorum	OG_5
pha|PHA_SNOT_14923	Phaeospheria nodorum	OG_5
pha|PHA_SNOT_09081	Phaeospheria nodorum	OG_5
pha|PHA_SNOT_09488	Phaeospheria nodorum	OG_5
pha|PHA_SNOT_01105	Phaeospheria nodorum	OG_5
pha|PHA_SNOT_14368	Phaeospheria nodorum	OG_5
ptr|PTRG_EDU45974	Pyrenophora tritici-repentis	OG_5
ptr|PTRG_EDU45992	Pyrenophora tritici-repentis	OG_5
ptr|PTRG_EDU43483	Pyrenophora tritici-repentis	OG_5
ptr|PTRG_EDU46171	Pyrenophora tritici-repentis	OG_5
ptr|PTRG_EDU41238	Pyrenophora tritici-repentis	OG_5
ptr|PTRG_EDU42152	Pyrenophora tritici-repentis	OG_5
ptr|PTRG_EDU43487	Pyrenophora tritici-repentis	OG_5
ptr|PTRG_EDU45965	Pyrenophora tritici-repentis	OG_5
ptr|PTRG_EDU43484	Pyrenophora tritici-repentis	OG_5
ptr|PTRG_EDU43179	Pyrenophora tritici-repentis	OG_5
ptr|PTRG_EDU41121	Pyrenophora tritici-repentis	OG_5
ptr|PTRG_EDU44809	Pyrenophora tritici-repentis	OG_5
ptt|PTT_EFQ92825	Pyrenophora teres	OG_5
ptt|PTT_EFQ94086	Pyrenophora teres	OG_5
ptt|PTT_EFQ85732	Pyrenophora teres	OG_5
ptt|PTT_EFQ87504	Pyrenophora teres	OG_5
ptt|PTT_EFQ89947	Pyrenophora teres	OG_5
ptt|PTT_EFQ92073	Pyrenophora teres	OG_5
ptt|PTT_EFQ86656	Pyrenophora teres	OG_5
ptt|PTT_EFQ92460	Pyrenophora teres	OG_5
ptt|PTT_EFQ90165	Pyrenophora teres	OG_5
ptt|PTT_EFQ90107	Pyrenophora teres	OG_5
ptt|PTT_EFQ93718	Pyrenophora teres	OG_5
ptt|PTT_EFQ88908	Pyrenophora teres	OG_5
ptt|PTT_EFQ92166	Pyrenophora teres	OG_5
ptt|PTT_EFQ85483	Pyrenophora teres	OG_5
ptt|PTT_EFQ85270	Pyrenophora teres	OG_5
ptt|PTT_EFQ89377	Pyrenophora teres	OG_5
ptt|PTT_EFQ88845	Pyrenophora teres	OG_5
ptt|PTT_EFQ87557	Pyrenophora teres	OG_5
ptt|PTT_EFQ91552	Pyrenophora teres	OG_5
ptt|PTT_EFQ85922	Pyrenophora teres	OG_5
ptt|PTT_EFQ85731	Pyrenophora teres	OG_5
ptt|PTT_EFQ87144	Pyrenophora teres	OG_5
ptt|PTT_EFQ85921	Pyrenophora teres	OG_5
ptt|PTT_EFQ90812	Pyrenophora teres	OG_5
ptt|PTT_EFQ87458	Pyrenophora teres	OG_5
ptt|PTT_EFQ94162	Pyrenophora teres	OG_5
ptt|PTT_EFQ94715	Pyrenophora teres	OG_5
ptt|PTT_EFQ87457	Pyrenophora teres	OG_5
ptt|PTT_EFQ93577	Pyrenophora teres	OG_5
ptt|PTT_EFQ92826	Pyrenophora teres	OG_5
ptt|PTT_EFQ94714	Pyrenophora teres	OG_5
ptt|PTT_EFQ88192	Pyrenophora teres	OG_5
ptt|PTT_EFQ86310	Pyrenophora teres	OG_5
ptt|PTT_EFQ85269	Pyrenophora teres	OG_5
ptt|PTT_EFQ92914	Pyrenophora teres	OG_5
ptt|PTT_EFQ90039	Pyrenophora teres	OG_5
ptt|PTT_EFQ93649	Pyrenophora teres	OG_5
ptt|PTT_EFQ94423	Pyrenophora teres	OG_5
ptt|PTT_EFQ85268	Pyrenophora teres	OG_5
ptt|PTT_EFQ88175	Pyrenophora teres	OG_5
ptt|PTT_EFQ88643	Pyrenophora teres	OG_5
ptt|PTT_EFQ87032	Pyrenophora teres	OG_5
ptt|PTT_EFQ88229	Pyrenophora teres	OG_5
ptt|PTT_EFQ85641	Pyrenophora teres	OG_5
Plyc_ER1518|7690_g	Pyrenochaeta lycopersici	OG_5
col|COL_CCF42257	Colletothricum higghisianum	OG_5
neu|NEU_EFNCRP00000005410	Neurospora crassa	OG_5
asp|ASP_CADANIAP00009366	Aspergillus nidulans	OG_5
fus|FUS_FOXG_11847P0	Fusarium oxysporum sp. lycopersici	OG_5
col|COL_CCF46648	Colletothricum higghisianum	OG_5
neu|NEU_EFNCRP00000007797	Neurospora crassa	OG_5
blu|BLU_CCU74732	Blumeria graminis	OG_5
fus|FUS_FOXG_17422P0	Fusarium oxysporum sp. lycopersici	OG_5
neu|NEU_EFNCRP00000006991	Neurospora crassa	OG_5
pha|PHA_SNOT_02134	Phaeospheria nodorum	OG_5
col|COL_CCF34576	Colletothricum higghisianum	OG_5
col|COL_CCF34790	Colletothricum higghisianum	OG_5
col|COL_CCF35725	Colletothricum higghisianum	OG_5
fus|FUS_FOXG_06448P0	Fusarium oxysporum sp. lycopersici	OG_5
ptr|PTRG_EDU51197	Pyrenophora tritici-repentis	OG_5
blu|BLU_CCU74731	Blumeria graminis	OG_5
col|COL_CCF44227	Colletothricum higghisianum	OG_5
ptt|PTT_EFQ91531	Pyrenophora teres	OG_5
ptt|PTT_EFQ96644	Pyrenophora teres	OG_5
fus|FUS_FOXG_04898P0	Fusarium oxysporum sp. lycopersici	OG_5
col|COL_CCF45303	Colletothricum higghisianum	OG_6
col|COL_CCF42192	Colletothricum higghisianum	OG_6
col|COL_CCF45131	Colletothricum higghisianum	OG_6
col|COL_CCF44003	Colletothricum higghisianum	OG_6
col|COL_CCF45093	Colletothricum higghisianum	OG_6
col|COL_CCF37649	Colletothricum higghisianum	OG_6
col|COL_CCF33714	Colletothricum higghisianum	OG_6
col|COL_CCF41967	Colletothricum higghisianum	OG_6
col|COL_CCF37961	Colletothricum higghisianum	OG_6
col|COL_CCF31956	Colletothricum higghisianum	OG_6
col|COL_CCF31827	Colletothricum higghisianum	OG_6
col|COL_CCF42035	Colletothricum higghisianum	OG_6
col|COL_CCF44947	Colletothricum higghisianum	OG_6
col|COL_CCF44061	Colletothricum higghisianum	OG_6
col|COL_CCF47071	Colletothricum higghisianum	OG_6
col|COL_CCF41338	Colletothricum higghisianum	OG_6
col|COL_CCF47249	Colletothricum higghisianum	OG_6
col|COL_CCF37792	Colletothricum higghisianum	OG_6
col|COL_CCF44083	Colletothricum higghisianum	OG_6
col|COL_CCF43113	Colletothricum higghisianum	OG_6
col|COL_CCF31823	Colletothricum higghisianum	OG_6
col|COL_CCF37156	Colletothricum higghisianum	OG_6
col|COL_CCF32598	Colletothricum higghisianum	OG_6
col|COL_CCF47211	Colletothricum higghisianum	OG_6
col|COL_CCF39958	Colletothricum higghisianum	OG_6
col|COL_CCF42388	Colletothricum higghisianum	OG_6
col|COL_CCF44535	Colletothricum higghisianum	OG_6
col|COL_CCF35374	Colletothricum higghisianum	OG_6
col|COL_CCF34690	Colletothricum higghisianum	OG_6
col|COL_CCF42272	Colletothricum higghisianum	OG_6
col|COL_CCF35286	Colletothricum higghisianum	OG_6
col|COL_CCF33276	Colletothricum higghisianum	OG_6
col|COL_CCF33623	Colletothricum higghisianum	OG_6
col|COL_CCF32189	Colletothricum higghisianum	OG_6
col|COL_CCF38905	Colletothricum higghisianum	OG_6
col|COL_CCF36555	Colletothricum higghisianum	OG_6
col|COL_CCF45326	Colletothricum higghisianum	OG_6
col|COL_CCF42352	Colletothricum higghisianum	OG_6
col|COL_CCF39895	Colletothricum higghisianum	OG_6
col|COL_CCF46665	Colletothricum higghisianum	OG_6
col|COL_CCF47772	Colletothricum higghisianum	OG_6
col|COL_CCF46570	Colletothricum higghisianum	OG_6
col|COL_CCF31857	Colletothricum higghisianum	OG_6
col|COL_CCF46547	Colletothricum higghisianum	OG_6
col|COL_CCF42331	Colletothricum higghisianum	OG_6
col|COL_CCF44775	Colletothricum higghisianum	OG_6
col|COL_CCF46917	Colletothricum higghisianum	OG_6
col|COL_CCF46112	Colletothricum higghisianum	OG_6
col|COL_CCF38002	Colletothricum higghisianum	OG_6
col|COL_CCF42317	Colletothricum higghisianum	OG_6
col|COL_CCF41657	Colletothricum higghisianum	OG_6
col|COL_CCF44234	Colletothricum higghisianum	OG_6
col|COL_CCF42612	Colletothricum higghisianum	OG_6
col|COL_CCF42534	Colletothricum higghisianum	OG_6
col|COL_CCF47408	Colletothricum higghisianum	OG_6
col|COL_CCF39937	Colletothricum higghisianum	OG_6
col|COL_CCF41367	Colletothricum higghisianum	OG_6
col|COL_CCF44387	Colletothricum higghisianum	OG_6
col|COL_CCF44815	Colletothricum higghisianum	OG_6
col|COL_CCF37371	Colletothricum higghisianum	OG_6
col|COL_CCF41248	Colletothricum higghisianum	OG_6
col|COL_CCF45332	Colletothricum higghisianum	OG_6
col|COL_CCF37033	Colletothricum higghisianum	OG_6
col|COL_CCF40778	Colletothricum higghisianum	OG_6
col|COL_CCF37556	Colletothricum higghisianum	OG_6
col|COL_CCF37258	Colletothricum higghisianum	OG_6
col|COL_CCF42337	Colletothricum higghisianum	OG_6
col|COL_CCF46625	Colletothricum higghisianum	OG_6
col|COL_CCF40095	Colletothricum higghisianum	OG_6
col|COL_CCF43077	Colletothricum higghisianum	OG_6
col|COL_CCF35357	Colletothricum higghisianum	OG_6
col|COL_CCF32191	Colletothricum higghisianum	OG_6
col|COL_CCF44077	Colletothricum higghisianum	OG_6
col|COL_CCF44944	Colletothricum higghisianum	OG_6
col|COL_CCF43022	Colletothricum higghisianum	OG_6
col|COL_CCF46216	Colletothricum higghisianum	OG_6
col|COL_CCF46217	Colletothricum higghisianum	OG_6
col|COL_CCF37361	Colletothricum higghisianum	OG_6
col|COL_CCF46234	Colletothricum higghisianum	OG_6
col|COL_CCF44972	Colletothricum higghisianum	OG_6
col|COL_CCF36365	Colletothricum higghisianum	OG_6
col|COL_CCF40018	Colletothricum higghisianum	OG_6
col|COL_CCF47091	Colletothricum higghisianum	OG_6
col|COL_CCF32184	Colletothricum higghisianum	OG_6
col|COL_CCF43672	Colletothricum higghisianum	OG_6
col|COL_CCF46400	Colletothricum higghisianum	OG_6
fus|FUS_FOXG_08210P0	Fusarium oxysporum sp. lycopersici	OG_6
fus|FUS_FOXG_06729P0	Fusarium oxysporum sp. lycopersici	OG_6
fus|FUS_FOXG_16311P0	Fusarium oxysporum sp. lycopersici	OG_6
fus|FUS_FOXG_15175P0	Fusarium oxysporum sp. lycopersici	OG_6
Plyc_ER1211|6092_g	Pyrenochaeta lycopersici type 2	OG_6
ptt|PTT_EFQ94906	Pyrenophora teres	OG_6
neu|NEU_EFNCRP00000002279	Neurospora crassa	OG_6
fus|FUS_FOXG_07193P0	Fusarium oxysporum sp. lycopersici	OG_6
fus|FUS_FOXG_17528P0	Fusarium oxysporum sp. lycopersici	OG_6
ptr|PTRG_EDU44816	Pyrenophora tritici-repentis	OG_6
asp|ASP_CADANIAP00007359	Aspergillus nidulans	OG_7
asp|ASP_CADANIAP00007936	Aspergillus nidulans	OG_7
asp|ASP_CADANIAP00007977	Aspergillus nidulans	OG_7
asp|ASP_CADANIAP00009721	Aspergillus nidulans	OG_7
asp|ASP_CADANIAP00009814	Aspergillus nidulans	OG_7
asp|ASP_CADANIAP00004741	Aspergillus nidulans	OG_7
asp|ASP_CADANIAP00005679	Aspergillus nidulans	OG_7
asp|ASP_CADANIAP00006247	Aspergillus nidulans	OG_7
asp|ASP_CADANIAP00001129	Aspergillus nidulans	OG_7
asp|ASP_CADANIAP00001452	Aspergillus nidulans	OG_7
asp|ASP_CADANIAP00000690	Aspergillus nidulans	OG_7
asp|ASP_CADANIAP00001893	Aspergillus nidulans	OG_7
asp|ASP_CADANIAP00002810	Aspergillus nidulans	OG_7
asp|ASP_CADANIAP00002976	Aspergillus nidulans	OG_7
Plyc_ER1518|10297_g	Pyrenochaeta lycopersici	OG_7
Plyc_ER1518|12544_g	Pyrenochaeta lycopersici	OG_7
Plyc_ER1518|16195_g	Pyrenochaeta lycopersici	OG_7
Plyc_ER1518|9769_g	Pyrenochaeta lycopersici	OG_7
Plyc_ER1518|1338_g	Pyrenochaeta lycopersici	OG_7
Plyc_ER1518|3905_g	Pyrenochaeta lycopersici	OG_7
Plyc_ER1518|7484_g	Pyrenochaeta lycopersici	OG_7
Plyc_ER1211|10294_g	Pyrenochaeta lycopersici type 2	OG_7
Plyc_ER1211|10950_g	Pyrenochaeta lycopersici type 2	OG_7
Plyc_ER1211|339_g	Pyrenochaeta lycopersici type 2	OG_7
Plyc_ER1211|4057_g	Pyrenochaeta lycopersici type 2	OG_7
Plyc_ER1211|5464_g	Pyrenochaeta lycopersici type 2	OG_7
Plyc_ER1211|6249_g	Pyrenochaeta lycopersici type 2	OG_7
col|COL_CCF35910	Colletothricum higghisianum	OG_7
col|COL_CCF34956	Colletothricum higghisianum	OG_7
col|COL_CCF32164	Colletothricum higghisianum	OG_7
col|COL_CCF37182	Colletothricum higghisianum	OG_7
col|COL_CCF39967	Colletothricum higghisianum	OG_7
col|COL_CCF41272	Colletothricum higghisianum	OG_7
col|COL_CCF37174	Colletothricum higghisianum	OG_7
col|COL_CCF41992	Colletothricum higghisianum	OG_7
col|COL_CCF42686	Colletothricum higghisianum	OG_7
col|COL_CCF35575	Colletothricum higghisianum	OG_7
col|COL_CCF46870	Colletothricum higghisianum	OG_7
col|COL_CCF41844	Colletothricum higghisianum	OG_7
col|COL_CCF33269	Colletothricum higghisianum	OG_7
col|COL_CCF44605	Colletothricum higghisianum	OG_7
fus|FUS_FOXG_16543P0	Fusarium oxysporum sp. lycopersici	OG_7
fus|FUS_FOXG_13653P0	Fusarium oxysporum sp. lycopersici	OG_7
fus|FUS_FOXG_11897P0	Fusarium oxysporum sp. lycopersici	OG_7
fus|FUS_FOXG_13381P0	Fusarium oxysporum sp. lycopersici	OG_7
fus|FUS_FOXG_17147P0	Fusarium oxysporum sp. lycopersici	OG_7
fus|FUS_FOXG_01535P0	Fusarium oxysporum sp. lycopersici	OG_7
fus|FUS_FOXG_02979P0	Fusarium oxysporum sp. lycopersici	OG_7
fus|FUS_FOXG_03541P0	Fusarium oxysporum sp. lycopersici	OG_7
fus|FUS_FOXG_15712P0	Fusarium oxysporum sp. lycopersici	OG_7
fus|FUS_FOXG_15760P0	Fusarium oxysporum sp. lycopersici	OG_7
fus|FUS_FOXG_04577P0	Fusarium oxysporum sp. lycopersici	OG_7
fus|FUS_FOXG_10675P0	Fusarium oxysporum sp. lycopersici	OG_7
fus|FUS_FOXG_05904P0	Fusarium oxysporum sp. lycopersici	OG_7
fus|FUS_FOXG_11989P0	Fusarium oxysporum sp. lycopersici	OG_7
lep|LEP_CBX92510	Leptosphaeria maculans	OG_7
lep|LEP_CBX90208	Leptosphaeria maculans	OG_7
lep|LEP_CBX90872	Leptosphaeria maculans	OG_7
lep|LEP_CBY01698	Leptosphaeria maculans	OG_7
lep|LEP_CBY00216	Leptosphaeria maculans	OG_7
lep|LEP_CBY00344	Leptosphaeria maculans	OG_7
lep|LEP_CBY00517	Leptosphaeria maculans	OG_7
neu|NEU_EFNCRP00000005649	Neurospora crassa	OG_7
neu|NEU_EFNCRP00000008550	Neurospora crassa	OG_7
neu|NEU_EFNCRP00000009608	Neurospora crassa	OG_7
neu|NEU_EFNCRP00000009796	Neurospora crassa	OG_7
pha|PHA_SNOT_14245	Phaeospheria nodorum	OG_7
pha|PHA_SNOT_03560	Phaeospheria nodorum	OG_7
pha|PHA_SNOT_03767	Phaeospheria nodorum	OG_7
pha|PHA_SNOT_06166	Phaeospheria nodorum	OG_7
pha|PHA_SNOT_06289	Phaeospheria nodorum	OG_7
pha|PHA_SNOT_07188	Phaeospheria nodorum	OG_7
pha|PHA_SNOT_10948	Phaeospheria nodorum	OG_7
pha|PHA_SNOT_12632	Phaeospheria nodorum	OG_7
ptr|PTRG_EDU44273	Pyrenophora tritici-repentis	OG_7
ptr|PTRG_EDU43939	Pyrenophora tritici-repentis	OG_7
ptr|PTRG_EDU45248	Pyrenophora tritici-repentis	OG_7
ptr|PTRG_EDU45317	Pyrenophora tritici-repentis	OG_7
ptr|PTRG_EDU40824	Pyrenophora tritici-repentis	OG_7
ptr|PTRG_EDU40939	Pyrenophora tritici-repentis	OG_7
ptr|PTRG_EDU41343	Pyrenophora tritici-repentis	OG_7
ptr|PTRG_EDU42354	Pyrenophora tritici-repentis	OG_7
ptt|PTT_EFQ95208	Pyrenophora teres	OG_7
ptt|PTT_EFQ90184	Pyrenophora teres	OG_7
ptt|PTT_EFQ89101	Pyrenophora teres	OG_7
ptt|PTT_EFQ88549	Pyrenophora teres	OG_7
ptt|PTT_EFQ94471	Pyrenophora teres	OG_7
ptt|PTT_EFQ92909	Pyrenophora teres	OG_7
ptt|PTT_EFQ86267	Pyrenophora teres	OG_7
ptt|PTT_EFQ88413	Pyrenophora teres	OG_7
blu|BLU_CCU75551	Blumeria graminis	OG_7
fus|FUS_FOXG_17197P0	Fusarium oxysporum sp. lycopersici	OG_7
fus|FUS_FOXG_02985P0	Fusarium oxysporum sp. lycopersici	OG_7
col|COL_CCF39947	Colletothricum higghisianum	OG_7
col|COL_CCF44383	Colletothricum higghisianum	OG_7
Plyc_ER1211|12146_g	Pyrenochaeta lycopersici type 2	OG_8
Plyc_ER1211|13800_g	Pyrenochaeta lycopersici type 2	OG_8
Plyc_ER1211|13976_g	Pyrenochaeta lycopersici type 2	OG_8
Plyc_ER1211|14198_g	Pyrenochaeta lycopersici type 2	OG_8
Plyc_ER1211|7356_g	Pyrenochaeta lycopersici type 2	OG_8
Plyc_ER1211|9068_g	Pyrenochaeta lycopersici type 2	OG_8
Plyc_ER1211|14089_g	Pyrenochaeta lycopersici type 2	OG_8
blu|BLU_CCU81587	Blumeria graminis	OG_8
blu|BLU_CCU83030	Blumeria graminis	OG_8
blu|BLU_CCU83196	Blumeria graminis	OG_8
blu|BLU_CCU83234	Blumeria graminis	OG_8
blu|BLU_CCU74485	Blumeria graminis	OG_8
blu|BLU_CCU82687	Blumeria graminis	OG_8
blu|BLU_CCU77013	Blumeria graminis	OG_8
blu|BLU_CCU82701	Blumeria graminis	OG_8
blu|BLU_CCU79026	Blumeria graminis	OG_8
blu|BLU_CCU74256	Blumeria graminis	OG_8
blu|BLU_CCU74387	Blumeria graminis	OG_8
blu|BLU_CCU76519	Blumeria graminis	OG_8
blu|BLU_CCU83239	Blumeria graminis	OG_8
blu|BLU_CCU83001	Blumeria graminis	OG_8
blu|BLU_CCU82070	Blumeria graminis	OG_8
blu|BLU_CCU82094	Blumeria graminis	OG_8
blu|BLU_CCU83047	Blumeria graminis	OG_8
blu|BLU_CCU75438	Blumeria graminis	OG_8
blu|BLU_CCU75490	Blumeria graminis	OG_8
blu|BLU_CCU81596	Blumeria graminis	OG_8
blu|BLU_CCU75909	Blumeria graminis	OG_8
blu|BLU_CCU75985	Blumeria graminis	OG_8
blu|BLU_CCU76931	Blumeria graminis	OG_8
blu|BLU_CCU77270	Blumeria graminis	OG_8
blu|BLU_CCU83246	Blumeria graminis	OG_8
blu|BLU_CCU82975	Blumeria graminis	OG_8
blu|BLU_CCU75020	Blumeria graminis	OG_8
blu|BLU_CCU83250	Blumeria graminis	OG_8
blu|BLU_CCU83153	Blumeria graminis	OG_8
blu|BLU_CCU74428	Blumeria graminis	OG_8
blu|BLU_CCU74478	Blumeria graminis	OG_8
blu|BLU_CCU83202	Blumeria graminis	OG_8
blu|BLU_CCU82099	Blumeria graminis	OG_8
blu|BLU_CCU82160	Blumeria graminis	OG_8
blu|BLU_CCU76463	Blumeria graminis	OG_8
blu|BLU_CCU76481	Blumeria graminis	OG_8
blu|BLU_CCU77478	Blumeria graminis	OG_8
blu|BLU_CCU83280	Blumeria graminis	OG_8
blu|BLU_CCU77682	Blumeria graminis	OG_8
blu|BLU_CCU82213	Blumeria graminis	OG_8
blu|BLU_CCU82805	Blumeria graminis	OG_8
blu|BLU_CCU83174	Blumeria graminis	OG_8
blu|BLU_CCU83175	Blumeria graminis	OG_8
blu|BLU_CCU82817	Blumeria graminis	OG_8
blu|BLU_CCU82826	Blumeria graminis	OG_8
blu|BLU_CCU78912	Blumeria graminis	OG_8
blu|BLU_CCU83141	Blumeria graminis	OG_8
blu|BLU_CCU82071	Blumeria graminis	OG_8
blu|BLU_CCU75228	Blumeria graminis	OG_8
blu|BLU_CCU75944	Blumeria graminis	OG_8
blu|BLU_CCU83197	Blumeria graminis	OG_8
blu|BLU_CCU82251	Blumeria graminis	OG_8
blu|BLU_CCU82254	Blumeria graminis	OG_8
blu|BLU_CCU83266	Blumeria graminis	OG_8
blu|BLU_CCU77117	Blumeria graminis	OG_8
blu|BLU_CCU77237	Blumeria graminis	OG_8
blu|BLU_CCU79831	Blumeria graminis	OG_8
blu|BLU_CCU74684	Blumeria graminis	OG_8
blu|BLU_CCU74686	Blumeria graminis	OG_8
blu|BLU_CCU75222	Blumeria graminis	OG_8
blu|BLU_CCU74247	Blumeria graminis	OG_8
blu|BLU_CCU74249	Blumeria graminis	OG_8
blu|BLU_CCU82162	Blumeria graminis	OG_8
blu|BLU_CCU76464	Blumeria graminis	OG_8
blu|BLU_CCU76485	Blumeria graminis	OG_8
blu|BLU_CCU83176	Blumeria graminis	OG_8
blu|BLU_CCU78151	Blumeria graminis	OG_8
blu|BLU_CCU75317	Blumeria graminis	OG_8
blu|BLU_CCU82072	Blumeria graminis	OG_8
blu|BLU_CCU74683	Blumeria graminis	OG_8
fus|FUS_FOXG_14032P0	Fusarium oxysporum sp. lycopersici	OG_8
fus|FUS_FOXG_12507P0	Fusarium oxysporum sp. lycopersici	OG_8
fus|FUS_FOXG_14083P0	Fusarium oxysporum sp. lycopersici	OG_8
fus|FUS_FOXG_12454P0	Fusarium oxysporum sp. lycopersici	OG_8
lep|LEP_CBX91488	Leptosphaeria maculans	OG_8
lep|LEP_CBX97175	Leptosphaeria maculans	OG_8
ptr|PTRG_EDU47892	Pyrenophora tritici-repentis	OG_8
ptr|PTRG_EDU46066	Pyrenophora tritici-repentis	OG_8
ptr|PTRG_EDU46210	Pyrenophora tritici-repentis	OG_8
Plyc_ER1518|16435_g	Pyrenochaeta lycopersici	OG_8
ptt|PTT_EFQ87720	Pyrenophora teres	OG_8
blu|BLU_CCU76925	Blumeria graminis	OG_9
blu|BLU_CCU74570	Blumeria graminis	OG_9
blu|BLU_CCU78396	Blumeria graminis	OG_9
col|COL_CCF41983	Colletothricum higghisianum	OG_9
col|COL_CCF43967	Colletothricum higghisianum	OG_9
ptr|PTRG_EDU42716	Pyrenophora tritici-repentis	OG_9
ptr|PTRG_EDU42735	Pyrenophora tritici-repentis	OG_9
ptr|PTRG_EDU46350	Pyrenophora tritici-repentis	OG_9
ptr|PTRG_EDU46628	Pyrenophora tritici-repentis	OG_9
ptr|PTRG_EDU47041	Pyrenophora tritici-repentis	OG_9
ptr|PTRG_EDU47106	Pyrenophora tritici-repentis	OG_9
ptr|PTRG_EDU48470	Pyrenophora tritici-repentis	OG_9
ptr|PTRG_EDU48780	Pyrenophora tritici-repentis	OG_9
ptr|PTRG_EDU48897	Pyrenophora tritici-repentis	OG_9
ptr|PTRG_EDU47753	Pyrenophora tritici-repentis	OG_9
ptr|PTRG_EDU46093	Pyrenophora tritici-repentis	OG_9
ptr|PTRG_EDU45953	Pyrenophora tritici-repentis	OG_9
ptr|PTRG_EDU50708	Pyrenophora tritici-repentis	OG_9
ptr|PTRG_EDU51042	Pyrenophora tritici-repentis	OG_9
ptr|PTRG_EDU44398	Pyrenophora tritici-repentis	OG_9
ptr|PTRG_EDU44399	Pyrenophora tritici-repentis	OG_9
ptr|PTRG_EDU44421	Pyrenophora tritici-repentis	OG_9
ptr|PTRG_EDU44486	Pyrenophora tritici-repentis	OG_9
ptr|PTRG_EDU43233	Pyrenophora tritici-repentis	OG_9
ptr|PTRG_EDU43482	Pyrenophora tritici-repentis	OG_9
ptr|PTRG_EDU49474	Pyrenophora tritici-repentis	OG_9
ptr|PTRG_EDU49631	Pyrenophora tritici-repentis	OG_9
ptr|PTRG_EDU49758	Pyrenophora tritici-repentis	OG_9
ptr|PTRG_EDU49770	Pyrenophora tritici-repentis	OG_9
ptr|PTRG_EDU46201	Pyrenophora tritici-repentis	OG_9
ptr|PTRG_EDU45215	Pyrenophora tritici-repentis	OG_9
ptr|PTRG_EDU45249	Pyrenophora tritici-repentis	OG_9
ptr|PTRG_EDU45628	Pyrenophora tritici-repentis	OG_9
ptr|PTRG_EDU44039	Pyrenophora tritici-repentis	OG_9
ptr|PTRG_EDU48208	Pyrenophora tritici-repentis	OG_9
ptr|PTRG_EDU51549	Pyrenophora tritici-repentis	OG_9
ptr|PTRG_EDU42868	Pyrenophora tritici-repentis	OG_9
ptr|PTRG_EDU43022	Pyrenophora tritici-repentis	OG_9
ptr|PTRG_EDU43070	Pyrenophora tritici-repentis	OG_9
ptr|PTRG_EDU46202	Pyrenophora tritici-repentis	OG_9
ptr|PTRG_EDU43140	Pyrenophora tritici-repentis	OG_9
ptr|PTRG_EDU43141	Pyrenophora tritici-repentis	OG_9
ptr|PTRG_EDU43145	Pyrenophora tritici-repentis	OG_9
ptr|PTRG_EDU49781	Pyrenophora tritici-repentis	OG_9
ptr|PTRG_EDU47288	Pyrenophora tritici-repentis	OG_9
ptr|PTRG_EDU40308	Pyrenophora tritici-repentis	OG_9
ptr|PTRG_EDU40572	Pyrenophora tritici-repentis	OG_9
ptr|PTRG_EDU40585	Pyrenophora tritici-repentis	OG_9
ptr|PTRG_EDU40587	Pyrenophora tritici-repentis	OG_9
ptr|PTRG_EDU40596	Pyrenophora tritici-repentis	OG_9
ptr|PTRG_EDU41347	Pyrenophora tritici-repentis	OG_9
ptr|PTRG_EDU41430	Pyrenophora tritici-repentis	OG_9
ptr|PTRG_EDU41543	Pyrenophora tritici-repentis	OG_9
ptr|PTRG_EDU41740	Pyrenophora tritici-repentis	OG_9
ptr|PTRG_EDU42035	Pyrenophora tritici-repentis	OG_9
ptr|PTRG_EDU42100	Pyrenophora tritici-repentis	OG_9
ptr|PTRG_EDU46351	Pyrenophora tritici-repentis	OG_9
ptr|PTRG_EDU50433	Pyrenophora tritici-repentis	OG_9
ptr|PTRG_EDU44996	Pyrenophora tritici-repentis	OG_9
ptr|PTRG_EDU40571	Pyrenophora tritici-repentis	OG_9
ptr|PTRG_EDU41217	Pyrenophora tritici-repentis	OG_9
ptr|PTRG_EDU48202	Pyrenophora tritici-repentis	OG_9
ptr|PTRG_EDU43693	Pyrenophora tritici-repentis	OG_9
ptr|PTRG_EDU46200	Pyrenophora tritici-repentis	OG_9
ptr|PTRG_EDU47298	Pyrenophora tritici-repentis	OG_9
ptr|PTRG_EDU49473	Pyrenophora tritici-repentis	OG_9
ptr|PTRG_EDU39823	Pyrenophora tritici-repentis	OG_9
ptr|PTRG_EDU41505	Pyrenophora tritici-repentis	OG_9
ptr|PTRG_EDU43469	Pyrenophora tritici-repentis	OG_9
ptr|PTRG_EDU40493	Pyrenophora tritici-repentis	OG_9
ptr|PTRG_EDU51596	Pyrenophora tritici-repentis	OG_9
ptt|PTT_EFQ85638	Pyrenophora teres	OG_9
ptt|PTT_EFQ85637	Pyrenophora teres	OG_9
Plyc_ER1211|5978_g	Pyrenochaeta lycopersici type 2	OG_9
blu|BLU_CCU78440	Blumeria graminis	OG_9
col|COL_CCF44056	Colletothricum higghisianum	OG_9
ptt|PTT_EFQ93015	Pyrenophora teres	OG_9
Plyc_ER1211|5979_g	Pyrenochaeta lycopersici type 2	OG_9
blu|BLU_CCU75198	Blumeria graminis	OG_9
fus|FUS_FOXG_08662P0	Fusarium oxysporum sp. lycopersici	OG_9
ptt|PTT_EFQ88012	Pyrenophora teres	OG_9
ptt|PTT_EFQ94268	Pyrenophora teres	OG_9
asp|ASP_CADANIAP00008993	Aspergillus nidulans	OG_10
asp|ASP_CADANIAP00009048	Aspergillus nidulans	OG_10
asp|ASP_CADANIAP00005135	Aspergillus nidulans	OG_10
asp|ASP_CADANIAP00001127	Aspergillus nidulans	OG_10
asp|ASP_CADANIAP00002295	Aspergillus nidulans	OG_10
asp|ASP_CADANIAP00006757	Aspergillus nidulans	OG_10
asp|ASP_CADANIAP00004588	Aspergillus nidulans	OG_10
Plyc_ER1211|6759_g	Pyrenochaeta lycopersici type 2	OG_10
Plyc_ER1211|9982_g	Pyrenochaeta lycopersici type 2	OG_10
Plyc_ER1211|9145_g	Pyrenochaeta lycopersici type 2	OG_10
col|COL_CCF46156	Colletothricum higghisianum	OG_10
col|COL_CCF34430	Colletothricum higghisianum	OG_10
col|COL_CCF39284	Colletothricum higghisianum	OG_10
col|COL_CCF35719	Colletothricum higghisianum	OG_10
col|COL_CCF42187	Colletothricum higghisianum	OG_10
col|COL_CCF40443	Colletothricum higghisianum	OG_10
col|COL_CCF34548	Colletothricum higghisianum	OG_10
col|COL_CCF43727	Colletothricum higghisianum	OG_10
col|COL_CCF33842	Colletothricum higghisianum	OG_10
col|COL_CCF41343	Colletothricum higghisianum	OG_10
fus|FUS_FOXG_00515P0	Fusarium oxysporum sp. lycopersici	OG_10
fus|FUS_FOXG_13902P0	Fusarium oxysporum sp. lycopersici	OG_10
fus|FUS_FOXG_02052P0	Fusarium oxysporum sp. lycopersici	OG_10
fus|FUS_FOXG_12952P0	Fusarium oxysporum sp. lycopersici	OG_10
fus|FUS_FOXG_09840P0	Fusarium oxysporum sp. lycopersici	OG_10
fus|FUS_FOXG_11845P0	Fusarium oxysporum sp. lycopersici	OG_10
fus|FUS_FOXG_01943P0	Fusarium oxysporum sp. lycopersici	OG_10
fus|FUS_FOXG_15633P0	Fusarium oxysporum sp. lycopersici	OG_10
fus|FUS_FOXG_07972P0	Fusarium oxysporum sp. lycopersici	OG_10
fus|FUS_FOXG_04763P0	Fusarium oxysporum sp. lycopersici	OG_10
fus|FUS_FOXG_14147P0	Fusarium oxysporum sp. lycopersici	OG_10
lep|LEP_CBX99230	Leptosphaeria maculans	OG_10
lep|LEP_CBX99271	Leptosphaeria maculans	OG_10
lep|LEP_CBX90735	Leptosphaeria maculans	OG_10
lep|LEP_CBX99732	Leptosphaeria maculans	OG_10
lep|LEP_CBY01299	Leptosphaeria maculans	OG_10
lep|LEP_CBY01876	Leptosphaeria maculans	OG_10
lep|LEP_CBX98935	Leptosphaeria maculans	OG_10
neu|NEU_EFNCRP00000007799	Neurospora crassa	OG_10
neu|NEU_EFNCRP00000007891	Neurospora crassa	OG_10
neu|NEU_EFNCRP00000009746	Neurospora crassa	OG_10
pha|PHA_SNOT_14365	Phaeospheria nodorum	OG_10
pha|PHA_SNOT_02135	Phaeospheria nodorum	OG_10
pha|PHA_SNOT_05636	Phaeospheria nodorum	OG_10
pha|PHA_SNOT_15094	Phaeospheria nodorum	OG_10
pha|PHA_SNOT_05968	Phaeospheria nodorum	OG_10
pha|PHA_SNOT_06002	Phaeospheria nodorum	OG_10
ptr|PTRG_EDU46235	Pyrenophora tritici-repentis	OG_10
ptr|PTRG_EDU48020	Pyrenophora tritici-repentis	OG_10
ptr|PTRG_EDU43478	Pyrenophora tritici-repentis	OG_10
ptr|PTRG_EDU45055	Pyrenophora tritici-repentis	OG_10
ptr|PTRG_EDU51194	Pyrenophora tritici-repentis	OG_10
ptr|PTRG_EDU41119	Pyrenophora tritici-repentis	OG_10
ptr|PTRG_EDU48011	Pyrenophora tritici-repentis	OG_10
ptt|PTT_EFQ93958	Pyrenophora teres	OG_10
ptt|PTT_EFQ90258	Pyrenophora teres	OG_10
ptt|PTT_EFQ94402	Pyrenophora teres	OG_10
ptt|PTT_EFQ93765	Pyrenophora teres	OG_10
ptt|PTT_EFQ86714	Pyrenophora teres	OG_10
ptt|PTT_EFQ94085	Pyrenophora teres	OG_10
ptt|PTT_EFQ91373	Pyrenophora teres	OG_10
ptt|PTT_EFQ90040	Pyrenophora teres	OG_10
ptt|PTT_EFQ90109	Pyrenophora teres	OG_10
Plyc_ER1518|6905_g	Pyrenochaeta lycopersici	OG_10
Plyc_ER1518|7282_g	Pyrenochaeta lycopersici	OG_10
Plyc_ER1211|5211_g	Pyrenochaeta lycopersici type 2	OG_10
Plyc_ER1211|8989_g	Pyrenochaeta lycopersici type 2	OG_10
col|COL_CCF40315	Colletothricum higghisianum	OG_10
col|COL_CCF44108	Colletothricum higghisianum	OG_10
lep|LEP_CBX91562	Leptosphaeria maculans	OG_10
asp|ASP_CADANIAP00007949	Aspergillus nidulans	OG_11
asp|ASP_CADANIAP00008212	Aspergillus nidulans	OG_11
asp|ASP_CADANIAP00004820	Aspergillus nidulans	OG_11
asp|ASP_CADANIAP00005199	Aspergillus nidulans	OG_11
asp|ASP_CADANIAP00001567	Aspergillus nidulans	OG_11
asp|ASP_CADANIAP00002785	Aspergillus nidulans	OG_11
asp|ASP_CADANIAP00002942	Aspergillus nidulans	OG_11
asp|ASP_CADANIAP00003037	Aspergillus nidulans	OG_11
Plyc_ER1518|14607_g	Pyrenochaeta lycopersici	OG_11
Plyc_ER1518|16312_g	Pyrenochaeta lycopersici	OG_11
Plyc_ER1518|3060_g	Pyrenochaeta lycopersici	OG_11
Plyc_ER1518|16645_g	Pyrenochaeta lycopersici	OG_11
Plyc_ER1518|17331_g	Pyrenochaeta lycopersici	OG_11
Plyc_ER1518|8116_g	Pyrenochaeta lycopersici	OG_11
Plyc_ER1518|58_g	Pyrenochaeta lycopersici	OG_11
Plyc_ER1211|1022_g	Pyrenochaeta lycopersici type 2	OG_11
Plyc_ER1211|14119_g	Pyrenochaeta lycopersici type 2	OG_11
Plyc_ER1211|2855_g	Pyrenochaeta lycopersici type 2	OG_11
Plyc_ER1211|7181_g	Pyrenochaeta lycopersici type 2	OG_11
Plyc_ER1211|7428_g	Pyrenochaeta lycopersici type 2	OG_11
Plyc_ER1211|10828_g	Pyrenochaeta lycopersici type 2	OG_11
Plyc_ER1211|13363_g	Pyrenochaeta lycopersici type 2	OG_11
Plyc_ER1211|13761_g	Pyrenochaeta lycopersici type 2	OG_11
Plyc_ER1211|7590_g	Pyrenochaeta lycopersici type 2	OG_11
Plyc_ER1211|8555_g	Pyrenochaeta lycopersici type 2	OG_11
Plyc_ER1211|1457_g	Pyrenochaeta lycopersici type 2	OG_11
Plyc_ER1211|3728_g	Pyrenochaeta lycopersici type 2	OG_11
Plyc_ER1211|4831_g	Pyrenochaeta lycopersici type 2	OG_11
Plyc_ER1211|13699_g	Pyrenochaeta lycopersici type 2	OG_11
Plyc_ER1211|14080_g	Pyrenochaeta lycopersici type 2	OG_11
Plyc_ER1211|7256_g	Pyrenochaeta lycopersici type 2	OG_11
Plyc_ER1211|14281_g	Pyrenochaeta lycopersici type 2	OG_11
Plyc_ER1211|14417_g	Pyrenochaeta lycopersici type 2	OG_11
col|COL_CCF34362	Colletothricum higghisianum	OG_11
col|COL_CCF39770	Colletothricum higghisianum	OG_11
fus|FUS_FOXG_16107P0	Fusarium oxysporum sp. lycopersici	OG_11
fus|FUS_FOXG_16110P0	Fusarium oxysporum sp. lycopersici	OG_11
fus|FUS_FOXG_06900P0	Fusarium oxysporum sp. lycopersici	OG_11
fus|FUS_FOXG_16268P0	Fusarium oxysporum sp. lycopersici	OG_11
fus|FUS_FOXG_16271P0	Fusarium oxysporum sp. lycopersici	OG_11
fus|FUS_FOXG_15699P0	Fusarium oxysporum sp. lycopersici	OG_11
fus|FUS_FOXG_06903P0	Fusarium oxysporum sp. lycopersici	OG_11
fus|FUS_FOXG_14688P0	Fusarium oxysporum sp. lycopersici	OG_11
fus|FUS_FOXG_14414P0	Fusarium oxysporum sp. lycopersici	OG_11
fus|FUS_FOXG_15067P0	Fusarium oxysporum sp. lycopersici	OG_11
ptr|PTRG_EDU46600	Pyrenophora tritici-repentis	OG_11
ptr|PTRG_EDU46143	Pyrenophora tritici-repentis	OG_11
ptr|PTRG_EDU47855	Pyrenophora tritici-repentis	OG_11
ptr|PTRG_EDU44430	Pyrenophora tritici-repentis	OG_11
ptr|PTRG_EDU51259	Pyrenophora tritici-repentis	OG_11
ptr|PTRG_EDU46057	Pyrenophora tritici-repentis	OG_11
ptr|PTRG_EDU49440	Pyrenophora tritici-repentis	OG_11
ptr|PTRG_EDU42310	Pyrenophora tritici-repentis	OG_11
ptt|PTT_EFQ87819	Pyrenophora teres	OG_11
pha|PHA_SNOT_12454	Phaeospheria nodorum	OG_11
pha|PHA_SNOT_00641	Phaeospheria nodorum	OG_11
Plyc_ER1211|12877_g	Pyrenochaeta lycopersici type 2	OG_11
ptr|PTRG_EDU42707	Pyrenophora tritici-repentis	OG_11
Plyc_ER1211|13766_g	Pyrenochaeta lycopersici type 2	OG_11
ptt|PTT_EFQ95916	Pyrenophora teres	OG_11
ptt|PTT_EFQ93942	Pyrenophora teres	OG_11
Plyc_ER1211|5678_g	Pyrenochaeta lycopersici type 2	OG_11
Plyc_ER1211|9020_g	Pyrenochaeta lycopersici type 2	OG_11
pha|PHA_SNOT_12640	Phaeospheria nodorum	OG_11
col|COL_CCF38661	Colletothricum higghisianum	OG_11
col|COL_CCF34156	Colletothricum higghisianum	OG_11
blu|BLU_CCU81574	Blumeria graminis	OG_12
blu|BLU_CCU81753	Blumeria graminis	OG_12
blu|BLU_CCU81754	Blumeria graminis	OG_12
blu|BLU_CCU81755	Blumeria graminis	OG_12
blu|BLU_CCU75001	Blumeria graminis	OG_12
blu|BLU_CCU75002	Blumeria graminis	OG_12
blu|BLU_CCU75003	Blumeria graminis	OG_12
blu|BLU_CCU75007	Blumeria graminis	OG_12
blu|BLU_CCU75010	Blumeria graminis	OG_12
blu|BLU_CCU75012	Blumeria graminis	OG_12
blu|BLU_CCU75013	Blumeria graminis	OG_12
blu|BLU_CCU75014	Blumeria graminis	OG_12
blu|BLU_CCU75016	Blumeria graminis	OG_12
blu|BLU_CCU75017	Blumeria graminis	OG_12
blu|BLU_CCU75018	Blumeria graminis	OG_12
blu|BLU_CCU75019	Blumeria graminis	OG_12
blu|BLU_CCU75022	Blumeria graminis	OG_12
blu|BLU_CCU75023	Blumeria graminis	OG_12
blu|BLU_CCU75024	Blumeria graminis	OG_12
blu|BLU_CCU75027	Blumeria graminis	OG_12
blu|BLU_CCU75028	Blumeria graminis	OG_12
blu|BLU_CCU75029	Blumeria graminis	OG_12
blu|BLU_CCU75031	Blumeria graminis	OG_12
blu|BLU_CCU75032	Blumeria graminis	OG_12
blu|BLU_CCU75037	Blumeria graminis	OG_12
blu|BLU_CCU81497	Blumeria graminis	OG_12
blu|BLU_CCU83259	Blumeria graminis	OG_12
blu|BLU_CCU83255	Blumeria graminis	OG_12
blu|BLU_CCU79338	Blumeria graminis	OG_12
blu|BLU_CCU74235	Blumeria graminis	OG_12
blu|BLU_CCU74257	Blumeria graminis	OG_12
blu|BLU_CCU74465	Blumeria graminis	OG_12
blu|BLU_CCU83274	Blumeria graminis	OG_12
blu|BLU_CCU83244	Blumeria graminis	OG_12
blu|BLU_CCU76697	Blumeria graminis	OG_12
blu|BLU_CCU76698	Blumeria graminis	OG_12
blu|BLU_CCU76714	Blumeria graminis	OG_12
blu|BLU_CCU83249	Blumeria graminis	OG_12
blu|BLU_CCU83214	Blumeria graminis	OG_12
blu|BLU_CCU83172	Blumeria graminis	OG_12
blu|BLU_CCU83221	Blumeria graminis	OG_12
blu|BLU_CCU75559	Blumeria graminis	OG_12
blu|BLU_CCU75000	Blumeria graminis	OG_12
blu|BLU_CCU81756	Blumeria graminis	OG_12
blu|BLU_CCU75005	Blumeria graminis	OG_12
blu|BLU_CCU75015	Blumeria graminis	OG_12
blu|BLU_CCU75021	Blumeria graminis	OG_12
blu|BLU_CCU75039	Blumeria graminis	OG_12
blu|BLU_CCU83245	Blumeria graminis	OG_12
blu|BLU_CCU81757	Blumeria graminis	OG_12
blu|BLU_CCU75006	Blumeria graminis	OG_12
blu|BLU_CCU75011	Blumeria graminis	OG_12
blu|BLU_CCU75033	Blumeria graminis	OG_12
blu|BLU_CCU74228	Blumeria graminis	OG_12
blu|BLU_CCU76699	Blumeria graminis	OG_12
blu|BLU_CCU82086	Blumeria graminis	OG_12
blu|BLU_CCU76700	Blumeria graminis	OG_12
asp|ASP_CADANIAP00007435	Aspergillus nidulans	OG_13
asp|ASP_CADANIAP00004577	Aspergillus nidulans	OG_13
asp|ASP_CADANIAP00004795	Aspergillus nidulans	OG_13
asp|ASP_CADANIAP00000031	Aspergillus nidulans	OG_13
asp|ASP_CADANIAP00007042	Aspergillus nidulans	OG_13
asp|ASP_CADANIAP00010267	Aspergillus nidulans	OG_13
fus|FUS_FOXG_09125P0	Fusarium oxysporum sp. lycopersici	OG_13
fus|FUS_FOXG_13018P0	Fusarium oxysporum sp. lycopersici	OG_13
fus|FUS_FOXG_09849P0	Fusarium oxysporum sp. lycopersici	OG_13
fus|FUS_FOXG_01313P0	Fusarium oxysporum sp. lycopersici	OG_13
fus|FUS_FOXG_02734P0	Fusarium oxysporum sp. lycopersici	OG_13
fus|FUS_FOXG_09571P0	Fusarium oxysporum sp. lycopersici	OG_13
fus|FUS_FOXG_02349P0	Fusarium oxysporum sp. lycopersici	OG_13
lep|LEP_CBX92329	Leptosphaeria maculans	OG_13
lep|LEP_CBX90866	Leptosphaeria maculans	OG_13
lep|LEP_CBX97437	Leptosphaeria maculans	OG_13
lep|LEP_CBX93055	Leptosphaeria maculans	OG_13
lep|LEP_CBX94846	Leptosphaeria maculans	OG_13
lep|LEP_CBY00592	Leptosphaeria maculans	OG_13
neu|NEU_EFNCRP00000004686	Neurospora crassa	OG_13
neu|NEU_EFNCRP00000004813	Neurospora crassa	OG_13
neu|NEU_EFNCRP00000008544	Neurospora crassa	OG_13
pha|PHA_SNOT_13498	Phaeospheria nodorum	OG_13
pha|PHA_SNOT_13675	Phaeospheria nodorum	OG_13
pha|PHA_SNOT_15710	Phaeospheria nodorum	OG_13
pha|PHA_SNOT_03442	Phaeospheria nodorum	OG_13
pha|PHA_SNOT_11881	Phaeospheria nodorum	OG_13
pha|PHA_SNOT_00263	Phaeospheria nodorum	OG_13
pha|PHA_SNOT_07725	Phaeospheria nodorum	OG_13
ptr|PTRG_EDU48263	Pyrenophora tritici-repentis	OG_13
ptr|PTRG_EDU49962	Pyrenophora tritici-repentis	OG_13
ptr|PTRG_EDU44274	Pyrenophora tritici-repentis	OG_13
ptr|PTRG_EDU42465	Pyrenophora tritici-repentis	OG_13
ptt|PTT_EFQ90419	Pyrenophora teres	OG_13
ptt|PTT_EFQ89221	Pyrenophora teres	OG_13
ptt|PTT_EFQ88766	Pyrenophora teres	OG_13
Plyc_ER1211|1650_g	Pyrenochaeta lycopersici type 2	OG_13
col|COL_CCF36272	Colletothricum higghisianum	OG_13
Plyc_ER1518|10407_g	Pyrenochaeta lycopersici	OG_13
col|COL_CCF36349	Colletothricum higghisianum	OG_13
fus|FUS_FOXG_14550P0	Fusarium oxysporum sp. lycopersici	OG_13
fus|FUS_FOXG_17167P0	Fusarium oxysporum sp. lycopersici	OG_13
fus|FUS_FOXG_15257P0	Fusarium oxysporum sp. lycopersici	OG_13
neu|NEU_EFNCRP00000005496	Neurospora crassa	OG_13
ptt|PTT_EFQ88412	Pyrenophora teres	OG_13
pha|PHA_SNOT_12988	Phaeospheria nodorum	OG_13
Plyc_ER1518|8930_g	Pyrenochaeta lycopersici	OG_13
col|COL_CCF47839	Colletothricum higghisianum	OG_13
neu|NEU_EFNCRP00000003389	Neurospora crassa	OG_13
Plyc_ER1211|11396_g	Pyrenochaeta lycopersici type 2	OG_13
col|COL_CCF43899	Colletothricum higghisianum	OG_13
Plyc_ER1211|4928_g	Pyrenochaeta lycopersici type 2	OG_13
col|COL_CCF36284	Colletothricum higghisianum	OG_13
ptr|PTRG_EDU39662	Pyrenophora tritici-repentis	OG_13
col|COL_CCF45957	Colletothricum higghisianum	OG_13
asp|ASP_CADANIAP00007595	Aspergillus nidulans	OG_14
asp|ASP_CADANIAP00007784	Aspergillus nidulans	OG_14
asp|ASP_CADANIAP00007786	Aspergillus nidulans	OG_14
asp|ASP_CADANIAP00008695	Aspergillus nidulans	OG_14
asp|ASP_CADANIAP00010401	Aspergillus nidulans	OG_14
asp|ASP_CADANIAP00010402	Aspergillus nidulans	OG_14
asp|ASP_CADANIAP00010444	Aspergillus nidulans	OG_14
asp|ASP_CADANIAP00005257	Aspergillus nidulans	OG_14
asp|ASP_CADANIAP00005286	Aspergillus nidulans	OG_14
asp|ASP_CADANIAP00002323	Aspergillus nidulans	OG_14
asp|ASP_CADANIAP00003072	Aspergillus nidulans	OG_14
asp|ASP_CADANIAP00003077	Aspergillus nidulans	OG_14
asp|ASP_CADANIAP00003243	Aspergillus nidulans	OG_14
asp|ASP_CADANIAP00003618	Aspergillus nidulans	OG_14
asp|ASP_CADANIAP00000974	Aspergillus nidulans	OG_14
asp|ASP_CADANIAP00000993	Aspergillus nidulans	OG_14
asp|ASP_CADANIAP00005320	Aspergillus nidulans	OG_14
asp|ASP_CADANIAP00002757	Aspergillus nidulans	OG_14
asp|ASP_CADANIAP00002768	Aspergillus nidulans	OG_14
asp|ASP_CADANIAP00003617	Aspergillus nidulans	OG_14
asp|ASP_CADANIAP00000975	Aspergillus nidulans	OG_14
asp|ASP_CADANIAP00000994	Aspergillus nidulans	OG_14
asp|ASP_CADANIAP00008876	Aspergillus nidulans	OG_14
asp|ASP_CADANIAP00005322	Aspergillus nidulans	OG_14
asp|ASP_CADANIAP00003075	Aspergillus nidulans	OG_14
asp|ASP_CADANIAP00003076	Aspergillus nidulans	OG_14
asp|ASP_CADANIAP00003619	Aspergillus nidulans	OG_14
asp|ASP_CADANIAP00000992	Aspergillus nidulans	OG_14
asp|ASP_CADANIAP00002149	Aspergillus nidulans	OG_14
asp|ASP_CADANIAP00002758	Aspergillus nidulans	OG_14
asp|ASP_CADANIAP00003615	Aspergillus nidulans	OG_14
asp|ASP_CADANIAP00000988	Aspergillus nidulans	OG_14
Plyc_ER1211|13896_g	Pyrenochaeta lycopersici type 2	OG_14
Plyc_ER1211|14009_g	Pyrenochaeta lycopersici type 2	OG_14
Plyc_ER1211|6681_g	Pyrenochaeta lycopersici type 2	OG_14
fus|FUS_FOXG_17760P0	Fusarium oxysporum sp. lycopersici	OG_14
fus|FUS_FOXG_17761P0	Fusarium oxysporum sp. lycopersici	OG_14
ptt|PTT_EFQ89570	Pyrenophora teres	OG_14
ptt|PTT_EFQ86698	Pyrenophora teres	OG_14
ptt|PTT_EFQ94931	Pyrenophora teres	OG_14
ptt|PTT_EFQ88856	Pyrenophora teres	OG_14
ptt|PTT_EFQ91147	Pyrenophora teres	OG_14
ptt|PTT_EFQ91148	Pyrenophora teres	OG_14
ptt|PTT_EFQ94540	Pyrenophora teres	OG_14
ptt|PTT_EFQ86464	Pyrenophora teres	OG_14
ptt|PTT_EFQ85054	Pyrenophora teres	OG_14
asp|ASP_CADANIAP00003854	Aspergillus nidulans	OG_14
Plyc_ER1211|13897_g	Pyrenochaeta lycopersici type 2	OG_14
col|COL_CCF36665	Colletothricum higghisianum	OG_14
ptt|PTT_EFQ94190	Pyrenophora teres	OG_14
ptr|PTRG_EDU50943	Pyrenophora tritici-repentis	OG_14
asp|ASP_CADANIAP00004650	Aspergillus nidulans	OG_15
asp|ASP_CADANIAP00005708	Aspergillus nidulans	OG_15
asp|ASP_CADANIAP00002613	Aspergillus nidulans	OG_15
asp|ASP_CADANIAP00007219	Aspergillus nidulans	OG_15
asp|ASP_CADANIAP00001248	Aspergillus nidulans	OG_15
Plyc_ER1211|11516_g	Pyrenochaeta lycopersici type 2	OG_15
Plyc_ER1211|3424_g	Pyrenochaeta lycopersici type 2	OG_15
Plyc_ER1211|7672_g	Pyrenochaeta lycopersici type 2	OG_15
blu|BLU_CCU75879	Blumeria graminis	OG_15
blu|BLU_CCU76109	Blumeria graminis	OG_15
blu|BLU_CCU77224	Blumeria graminis	OG_15
blu|BLU_CCU81826	Blumeria graminis	OG_15
blu|BLU_CCU82295	Blumeria graminis	OG_15
col|COL_CCF39391	Colletothricum higghisianum	OG_15
col|COL_CCF32845	Colletothricum higghisianum	OG_15
col|COL_CCF34052	Colletothricum higghisianum	OG_15
col|COL_CCF39360	Colletothricum higghisianum	OG_15
col|COL_CCF39471	Colletothricum higghisianum	OG_15
fus|FUS_FOXG_00605P0	Fusarium oxysporum sp. lycopersici	OG_15
fus|FUS_FOXG_09175P0	Fusarium oxysporum sp. lycopersici	OG_15
fus|FUS_FOXG_12684P0	Fusarium oxysporum sp. lycopersici	OG_15
fus|FUS_FOXG_05009P0	Fusarium oxysporum sp. lycopersici	OG_15
lep|LEP_CBX93830	Leptosphaeria maculans	OG_15
lep|LEP_CBX92915	Leptosphaeria maculans	OG_15
lep|LEP_CBX95601	Leptosphaeria maculans	OG_15
neu|NEU_EFNCRP00000001852	Neurospora crassa	OG_15
neu|NEU_EFNCRP00000002006	Neurospora crassa	OG_15
neu|NEU_EFNCRP00000006167	Neurospora crassa	OG_15
neu|NEU_EFNCRP00000008121	Neurospora crassa	OG_15
neu|NEU_EFNCRP00000006801	Neurospora crassa	OG_15
pha|PHA_SNOT_03304	Phaeospheria nodorum	OG_15
pha|PHA_SNOT_08693	Phaeospheria nodorum	OG_15
pha|PHA_SNOT_04637	Phaeospheria nodorum	OG_15
pha|PHA_SNOT_07247	Phaeospheria nodorum	OG_15
ptr|PTRG_EDU50692	Pyrenophora tritici-repentis	OG_15
ptr|PTRG_EDU44621	Pyrenophora tritici-repentis	OG_15
ptr|PTRG_EDU39913	Pyrenophora tritici-repentis	OG_15
ptr|PTRG_EDU42013	Pyrenophora tritici-repentis	OG_15
ptt|PTT_EFQ96433	Pyrenophora teres	OG_15
ptt|PTT_EFQ95450	Pyrenophora teres	OG_15
ptt|PTT_EFQ89042	Pyrenophora teres	OG_15
ptt|PTT_EFQ86962	Pyrenophora teres	OG_15
Plyc_ER1518|10184_g	Pyrenochaeta lycopersici	OG_15
Plyc_ER1211|11207_g	Pyrenochaeta lycopersici type 2	OG_15
fus|FUS_FOXG_11165P0	Fusarium oxysporum sp. lycopersici	OG_15
lep|LEP_CBX93946	Leptosphaeria maculans	OG_15
pha|PHA_SNOT_08770	Phaeospheria nodorum	OG_15
ptr|PTRG_EDU41851	Pyrenophora tritici-repentis	OG_15
ptt|PTT_EFQ96591	Pyrenophora teres	OG_15
asp|ASP_CADANIAP00008912	Aspergillus nidulans	OG_16
asp|ASP_CADANIAP00009350	Aspergillus nidulans	OG_16
asp|ASP_CADANIAP00003880	Aspergillus nidulans	OG_16
asp|ASP_CADANIAP00004796	Aspergillus nidulans	OG_16
asp|ASP_CADANIAP00001957	Aspergillus nidulans	OG_16
Plyc_ER1518|3950_g	Pyrenochaeta lycopersici	OG_16
Plyc_ER1518|7961_g	Pyrenochaeta lycopersici	OG_16
col|COL_CCF36678	Colletothricum higghisianum	OG_16
col|COL_CCF39991	Colletothricum higghisianum	OG_16
col|COL_CCF45158	Colletothricum higghisianum	OG_16
col|COL_CCF39452	Colletothricum higghisianum	OG_16
col|COL_CCF36938	Colletothricum higghisianum	OG_16
fus|FUS_FOXG_12989P0	Fusarium oxysporum sp. lycopersici	OG_16
fus|FUS_FOXG_12092P0	Fusarium oxysporum sp. lycopersici	OG_16
fus|FUS_FOXG_12336P0	Fusarium oxysporum sp. lycopersici	OG_16
fus|FUS_FOXG_17136P0	Fusarium oxysporum sp. lycopersici	OG_16
fus|FUS_FOXG_01365P0	Fusarium oxysporum sp. lycopersici	OG_16
fus|FUS_FOXG_10604P0	Fusarium oxysporum sp. lycopersici	OG_16
fus|FUS_FOXG_05708P0	Fusarium oxysporum sp. lycopersici	OG_16
fus|FUS_FOXG_09624P0	Fusarium oxysporum sp. lycopersici	OG_16
fus|FUS_FOXG_01101P0	Fusarium oxysporum sp. lycopersici	OG_16
fus|FUS_FOXG_17665P0	Fusarium oxysporum sp. lycopersici	OG_16
fus|FUS_FOXG_10818P0	Fusarium oxysporum sp. lycopersici	OG_16
pha|PHA_SNOT_03622	Phaeospheria nodorum	OG_16
pha|PHA_SNOT_04685	Phaeospheria nodorum	OG_16
ptr|PTRG_EDU50562	Pyrenophora tritici-repentis	OG_16
ptr|PTRG_EDU45430	Pyrenophora tritici-repentis	OG_16
ptt|PTT_EFQ87217	Pyrenophora teres	OG_16
ptt|PTT_EFQ95441	Pyrenophora teres	OG_16
asp|ASP_CADANIAP00008174	Aspergillus nidulans	OG_16
Plyc_ER1518|4875_g	Pyrenochaeta lycopersici	OG_16
blu|BLU_CCU79929	Blumeria graminis	OG_16
col|COL_CCF41160	Colletothricum higghisianum	OG_16
fus|FUS_FOXG_05922P0	Fusarium oxysporum sp. lycopersici	OG_16
lep|LEP_CBX95321	Leptosphaeria maculans	OG_16
neu|NEU_EFNCRP00000002092	Neurospora crassa	OG_16
pha|PHA_SNOT_04686	Phaeospheria nodorum	OG_16
ptr|PTRG_EDU50561	Pyrenophora tritici-repentis	OG_16
ptt|PTT_EFQ87218	Pyrenophora teres	OG_16
lep|LEP_CBX90257	Leptosphaeria maculans	OG_16
lep|LEP_CBX93190	Leptosphaeria maculans	OG_16
neu|NEU_EFNCRP00000007395	Neurospora crassa	OG_16
Plyc_ER1211|6089_g	Pyrenochaeta lycopersici type 2	OG_16
lep|LEP_CBX95322	Leptosphaeria maculans	OG_16
lep|LEP_CBX95323	Leptosphaeria maculans	OG_16
asp|ASP_CADANIAP00009258	Aspergillus nidulans	OG_17
asp|ASP_CADANIAP00003909	Aspergillus nidulans	OG_17
asp|ASP_CADANIAP00005191	Aspergillus nidulans	OG_17
asp|ASP_CADANIAP00003271	Aspergillus nidulans	OG_17
Plyc_ER1518|11246_g	Pyrenochaeta lycopersici	OG_17
Plyc_ER1518|15725_g	Pyrenochaeta lycopersici	OG_17
blu|BLU_CCU81953	Blumeria graminis	OG_17
blu|BLU_CCU82338	Blumeria graminis	OG_17
blu|BLU_CCU82341	Blumeria graminis	OG_17
blu|BLU_CCU76314	Blumeria graminis	OG_17
blu|BLU_CCU83210	Blumeria graminis	OG_17
blu|BLU_CCU74439	Blumeria graminis	OG_17
blu|BLU_CCU74443	Blumeria graminis	OG_17
blu|BLU_CCU74454	Blumeria graminis	OG_17
blu|BLU_CCU74458	Blumeria graminis	OG_17
blu|BLU_CCU74467	Blumeria graminis	OG_17
blu|BLU_CCU78773	Blumeria graminis	OG_17
blu|BLU_CCU78500	Blumeria graminis	OG_17
blu|BLU_CCU74474	Blumeria graminis	OG_17
blu|BLU_CCU81973	Blumeria graminis	OG_17
blu|BLU_CCU74475	Blumeria graminis	OG_17
blu|BLU_CCU76968	Blumeria graminis	OG_17
blu|BLU_CCU74452	Blumeria graminis	OG_17
blu|BLU_CCU74469	Blumeria graminis	OG_17
blu|BLU_CCU74473	Blumeria graminis	OG_17
blu|BLU_CCU74449	Blumeria graminis	OG_17
col|COL_CCF34742	Colletothricum higghisianum	OG_17
col|COL_CCF31743	Colletothricum higghisianum	OG_17
fus|FUS_FOXG_16146P0	Fusarium oxysporum sp. lycopersici	OG_17
fus|FUS_FOXG_06464P0	Fusarium oxysporum sp. lycopersici	OG_17
fus|FUS_FOXG_06800P0	Fusarium oxysporum sp. lycopersici	OG_17
fus|FUS_FOXG_06864P0	Fusarium oxysporum sp. lycopersici	OG_17
fus|FUS_FOXG_14921P0	Fusarium oxysporum sp. lycopersici	OG_17
fus|FUS_FOXG_07109P0	Fusarium oxysporum sp. lycopersici	OG_17
fus|FUS_FOXG_07359P0	Fusarium oxysporum sp. lycopersici	OG_17
fus|FUS_FOXG_16233P0	Fusarium oxysporum sp. lycopersici	OG_17
fus|FUS_FOXG_14685P0	Fusarium oxysporum sp. lycopersici	OG_17
fus|FUS_FOXG_16383P0	Fusarium oxysporum sp. lycopersici	OG_17
fus|FUS_FOXG_00233P0	Fusarium oxysporum sp. lycopersici	OG_17
lep|LEP_CBX90439	Leptosphaeria maculans	OG_17
pha|PHA_SNOT_03889	Phaeospheria nodorum	OG_17
ptr|PTRG_EDU45500	Pyrenophora tritici-repentis	OG_17
ptt|PTT_EFQ94342	Pyrenophora teres	OG_17
neu|NEU_EFNCRP00000009461	Neurospora crassa	OG_17
asp|ASP_CADANIAP00000165	Aspergillus nidulans	OG_18
asp|ASP_CADANIAP00000257	Aspergillus nidulans	OG_18
asp|ASP_CADANIAP00009705	Aspergillus nidulans	OG_18
asp|ASP_CADANIAP00010134	Aspergillus nidulans	OG_18
asp|ASP_CADANIAP00010308	Aspergillus nidulans	OG_18
asp|ASP_CADANIAP00010391	Aspergillus nidulans	OG_18
asp|ASP_CADANIAP00000372	Aspergillus nidulans	OG_18
asp|ASP_CADANIAP00004254	Aspergillus nidulans	OG_18
asp|ASP_CADANIAP00004707	Aspergillus nidulans	OG_18
asp|ASP_CADANIAP00005204	Aspergillus nidulans	OG_18
asp|ASP_CADANIAP00006088	Aspergillus nidulans	OG_18
asp|ASP_CADANIAP00000893	Aspergillus nidulans	OG_18
asp|ASP_CADANIAP00010403	Aspergillus nidulans	OG_18
asp|ASP_CADANIAP00010404	Aspergillus nidulans	OG_18
asp|ASP_CADANIAP00010455	Aspergillus nidulans	OG_18
asp|ASP_CADANIAP00000373	Aspergillus nidulans	OG_18
asp|ASP_CADANIAP00003997	Aspergillus nidulans	OG_18
asp|ASP_CADANIAP00004708	Aspergillus nidulans	OG_18
asp|ASP_CADANIAP00006398	Aspergillus nidulans	OG_18
asp|ASP_CADANIAP00002055	Aspergillus nidulans	OG_18
asp|ASP_CADANIAP00002335	Aspergillus nidulans	OG_18
asp|ASP_CADANIAP00000977	Aspergillus nidulans	OG_18
asp|ASP_CADANIAP00010307	Aspergillus nidulans	OG_18
asp|ASP_CADANIAP00003996	Aspergillus nidulans	OG_18
blu|BLU_CCU81551	Blumeria graminis	OG_18
blu|BLU_CCU77161	Blumeria graminis	OG_18
blu|BLU_CCU81433	Blumeria graminis	OG_18
blu|BLU_CCU79231	Blumeria graminis	OG_18
blu|BLU_CCU81843	Blumeria graminis	OG_18
blu|BLU_CCU81085	Blumeria graminis	OG_18
blu|BLU_CCU74408	Blumeria graminis	OG_18
ptr|PTRG_EDU42301	Pyrenophora tritici-repentis	OG_18
ptr|PTRG_EDU49862	Pyrenophora tritici-repentis	OG_18
Plyc_ER1518|875_g	Pyrenochaeta lycopersici	OG_18
fus|FUS_FOXG_17592P0	Fusarium oxysporum sp. lycopersici	OG_18
ptt|PTT_EFQ92047	Pyrenophora teres	OG_18
col|COL_CCF35795	Colletothricum higghisianum	OG_18
fus|FUS_FOXG_17759P0	Fusarium oxysporum sp. lycopersici	OG_18
Plyc_ER1211|7183_g	Pyrenochaeta lycopersici type 2	OG_18
ptt|PTT_EFQ90766	Pyrenophora teres	OG_18
blu|BLU_CCU76238	Blumeria graminis	OG_18
col|COL_CCF46062	Colletothricum higghisianum	OG_18
ptt|PTT_EFQ96646	Pyrenophora teres	OG_18
asp|ASP_CADANIAP00007333	Aspergillus nidulans	OG_19
asp|ASP_CADANIAP00008983	Aspergillus nidulans	OG_19
asp|ASP_CADANIAP00010032	Aspergillus nidulans	OG_19
asp|ASP_CADANIAP00010381	Aspergillus nidulans	OG_19
asp|ASP_CADANIAP00004126	Aspergillus nidulans	OG_19
asp|ASP_CADANIAP00005279	Aspergillus nidulans	OG_19
asp|ASP_CADANIAP00005528	Aspergillus nidulans	OG_19
asp|ASP_CADANIAP00006066	Aspergillus nidulans	OG_19
asp|ASP_CADANIAP00006274	Aspergillus nidulans	OG_19
asp|ASP_CADANIAP00000619	Aspergillus nidulans	OG_19
asp|ASP_CADANIAP00006452	Aspergillus nidulans	OG_19
asp|ASP_CADANIAP00001677	Aspergillus nidulans	OG_19
asp|ASP_CADANIAP00001834	Aspergillus nidulans	OG_19
asp|ASP_CADANIAP00002005	Aspergillus nidulans	OG_19
asp|ASP_CADANIAP00002153	Aspergillus nidulans	OG_19
asp|ASP_CADANIAP00003762	Aspergillus nidulans	OG_19
asp|ASP_CADANIAP00007176	Aspergillus nidulans	OG_19
Plyc_ER1211|13584_g	Pyrenochaeta lycopersici type 2	OG_19
Plyc_ER1211|13754_g	Pyrenochaeta lycopersici type 2	OG_19
Plyc_ER1211|2637_g	Pyrenochaeta lycopersici type 2	OG_19
Plyc_ER1211|6954_g	Pyrenochaeta lycopersici type 2	OG_19
col|COL_CCF45783	Colletothricum higghisianum	OG_19
col|COL_CCF43051	Colletothricum higghisianum	OG_19
col|COL_CCF44069	Colletothricum higghisianum	OG_19
col|COL_CCF46064	Colletothricum higghisianum	OG_19
lep|LEP_CBX92290	Leptosphaeria maculans	OG_19
lep|LEP_CBX94154	Leptosphaeria maculans	OG_19
ptt|PTT_EFQ94160	Pyrenophora teres	OG_19
ptt|PTT_EFQ93559	Pyrenophora teres	OG_19
ptt|PTT_EFQ90767	Pyrenophora teres	OG_19
ptt|PTT_EFQ84978	Pyrenophora teres	OG_19
ptt|PTT_EFQ90857	Pyrenophora teres	OG_19
ptt|PTT_EFQ87939	Pyrenophora teres	OG_19
Plyc_ER1211|13245_g	Pyrenochaeta lycopersici type 2	OG_19
lep|LEP_CBY01013	Leptosphaeria maculans	OG_19
Plyc_ER1211|14500_g	Pyrenochaeta lycopersici type 2	OG_19
Plyc_ER1211|7020_g	Pyrenochaeta lycopersici type 2	OG_19
ptr|PTRG_EDU46088	Pyrenophora tritici-repentis	OG_19
ptt|PTT_EFQ94161	Pyrenophora teres	OG_19
Plyc_ER1211|5432_g	Pyrenochaeta lycopersici type 2	OG_19
ptr|PTRG_EDU44804	Pyrenophora tritici-repentis	OG_19
fus|FUS_FOXG_12587P0	Fusarium oxysporum sp. lycopersici	OG_20
fus|FUS_FOXG_07027P0	Fusarium oxysporum sp. lycopersici	OG_20
fus|FUS_FOXG_17086P0	Fusarium oxysporum sp. lycopersici	OG_20
fus|FUS_FOXG_14002P0	Fusarium oxysporum sp. lycopersici	OG_20
fus|FUS_FOXG_17094P0	Fusarium oxysporum sp. lycopersici	OG_20
fus|FUS_FOXG_17101P0	Fusarium oxysporum sp. lycopersici	OG_20
fus|FUS_FOXG_14222P0	Fusarium oxysporum sp. lycopersici	OG_20
fus|FUS_FOXG_14236P0	Fusarium oxysporum sp. lycopersici	OG_20
fus|FUS_FOXG_14245P0	Fusarium oxysporum sp. lycopersici	OG_20
fus|FUS_FOXG_16413P0	Fusarium oxysporum sp. lycopersici	OG_20
fus|FUS_FOXG_16419P0	Fusarium oxysporum sp. lycopersici	OG_20
fus|FUS_FOXG_16423P0	Fusarium oxysporum sp. lycopersici	OG_20
fus|FUS_FOXG_17273P0	Fusarium oxysporum sp. lycopersici	OG_20
fus|FUS_FOXG_17286P0	Fusarium oxysporum sp. lycopersici	OG_20
fus|FUS_FOXG_17427P0	Fusarium oxysporum sp. lycopersici	OG_20
fus|FUS_FOXG_17638P0	Fusarium oxysporum sp. lycopersici	OG_20
fus|FUS_FOXG_15708P0	Fusarium oxysporum sp. lycopersici	OG_20
fus|FUS_FOXG_03947P0	Fusarium oxysporum sp. lycopersici	OG_20
fus|FUS_FOXG_03948P0	Fusarium oxysporum sp. lycopersici	OG_20
fus|FUS_FOXG_04036P0	Fusarium oxysporum sp. lycopersici	OG_20
fus|FUS_FOXG_10736P0	Fusarium oxysporum sp. lycopersici	OG_20
fus|FUS_FOXG_05616P0	Fusarium oxysporum sp. lycopersici	OG_20
fus|FUS_FOXG_05783P0	Fusarium oxysporum sp. lycopersici	OG_20
fus|FUS_FOXG_05786P0	Fusarium oxysporum sp. lycopersici	OG_20
fus|FUS_FOXG_15945P0	Fusarium oxysporum sp. lycopersici	OG_20
fus|FUS_FOXG_17316P0	Fusarium oxysporum sp. lycopersici	OG_20
fus|FUS_FOXG_17324P0	Fusarium oxysporum sp. lycopersici	OG_20
fus|FUS_FOXG_12537P0	Fusarium oxysporum sp. lycopersici	OG_20
fus|FUS_FOXG_12588P0	Fusarium oxysporum sp. lycopersici	OG_20
fus|FUS_FOXG_17085P0	Fusarium oxysporum sp. lycopersici	OG_20
fus|FUS_FOXG_14001P0	Fusarium oxysporum sp. lycopersici	OG_20
fus|FUS_FOXG_16442P0	Fusarium oxysporum sp. lycopersici	OG_20
fus|FUS_FOXG_17697P0	Fusarium oxysporum sp. lycopersici	OG_20
fus|FUS_FOXG_12538P0	Fusarium oxysporum sp. lycopersici	OG_20
fus|FUS_FOXG_14229P0	Fusarium oxysporum sp. lycopersici	OG_20
fus|FUS_FOXG_17195P0	Fusarium oxysporum sp. lycopersici	OG_20
fus|FUS_FOXG_17110P0	Fusarium oxysporum sp. lycopersici	OG_20
ptt|PTT_EFQ86469	Pyrenophora teres	OG_20
ptr|PTRG_EDU50802	Pyrenophora tritici-repentis	OG_20
lep|LEP_CBX97429	Leptosphaeria maculans	OG_20
lep|LEP_CBX97430	Leptosphaeria maculans	OG_20
asp|ASP_CADANIAP00007424	Aspergillus nidulans	OG_21
asp|ASP_CADANIAP00008265	Aspergillus nidulans	OG_21
asp|ASP_CADANIAP00000790	Aspergillus nidulans	OG_21
Plyc_ER1518|12017_g	Pyrenochaeta lycopersici	OG_21
Plyc_ER1518|1398_g	Pyrenochaeta lycopersici	OG_21
Plyc_ER1518|14141_g	Pyrenochaeta lycopersici	OG_21
Plyc_ER1518|14527_g	Pyrenochaeta lycopersici	OG_21
col|COL_CCF38563	Colletothricum higghisianum	OG_21
col|COL_CCF38387	Colletothricum higghisianum	OG_21
col|COL_CCF40882	Colletothricum higghisianum	OG_21
col|COL_CCF44624	Colletothricum higghisianum	OG_21
col|COL_CCF35721	Colletothricum higghisianum	OG_21
col|COL_CCF45835	Colletothricum higghisianum	OG_21
fus|FUS_FOXG_06571P0	Fusarium oxysporum sp. lycopersici	OG_21
fus|FUS_FOXG_06575P0	Fusarium oxysporum sp. lycopersici	OG_21
fus|FUS_FOXG_06687P0	Fusarium oxysporum sp. lycopersici	OG_21
fus|FUS_FOXG_06691P0	Fusarium oxysporum sp. lycopersici	OG_21
fus|FUS_FOXG_07251P0	Fusarium oxysporum sp. lycopersici	OG_21
fus|FUS_FOXG_07255P0	Fusarium oxysporum sp. lycopersici	OG_21
fus|FUS_FOXG_09046P0	Fusarium oxysporum sp. lycopersici	OG_21
fus|FUS_FOXG_10377P0	Fusarium oxysporum sp. lycopersici	OG_21
fus|FUS_FOXG_05702P0	Fusarium oxysporum sp. lycopersici	OG_21
fus|FUS_FOXG_09169P0	Fusarium oxysporum sp. lycopersici	OG_21
fus|FUS_FOXG_11383P0	Fusarium oxysporum sp. lycopersici	OG_21
lep|LEP_CBX94167	Leptosphaeria maculans	OG_21
lep|LEP_CBX96004	Leptosphaeria maculans	OG_21
lep|LEP_CBY01517	Leptosphaeria maculans	OG_21
neu|NEU_EFNCRP00000001403	Neurospora crassa	OG_21
neu|NEU_EFNCRP00000008209	Neurospora crassa	OG_21
neu|NEU_EFNCRP00000008354	Neurospora crassa	OG_21
pha|PHA_SNOT_15715	Phaeospheria nodorum	OG_21
pha|PHA_SNOT_09636	Phaeospheria nodorum	OG_21
pha|PHA_SNOT_11155	Phaeospheria nodorum	OG_21
ptr|PTRG_EDU44576	Pyrenophora tritici-repentis	OG_21
ptr|PTRG_EDU50202	Pyrenophora tritici-repentis	OG_21
ptr|PTRG_EDU42485	Pyrenophora tritici-repentis	OG_21
ptt|PTT_EFQ89175	Pyrenophora teres	OG_21
ptt|PTT_EFQ90640	Pyrenophora teres	OG_21
ptt|PTT_EFQ93348	Pyrenophora teres	OG_21
Plyc_ER1211|11241_g	Pyrenochaeta lycopersici type 2	OG_21
col|COL_CCF38767	Colletothricum higghisianum	OG_22
col|COL_CCF35021	Colletothricum higghisianum	OG_22
col|COL_CCF47624	Colletothricum higghisianum	OG_22
col|COL_CCF46395	Colletothricum higghisianum	OG_22
fus|FUS_FOXG_11012P0	Fusarium oxysporum sp. lycopersici	OG_22
fus|FUS_FOXG_05493P0	Fusarium oxysporum sp. lycopersici	OG_22
ptr|PTRG_EDU47131	Pyrenophora tritici-repentis	OG_22
ptr|PTRG_EDU42399	Pyrenophora tritici-repentis	OG_22
ptt|PTT_EFQ92311	Pyrenophora teres	OG_22
ptt|PTT_EFQ95734	Pyrenophora teres	OG_22
asp|ASP_CADANIAP00008714	Aspergillus nidulans	OG_22
blu|BLU_CCU82139	Blumeria graminis	OG_22
fus|FUS_FOXG_00977P0	Fusarium oxysporum sp. lycopersici	OG_22
lep|LEP_CBX97511	Leptosphaeria maculans	OG_22
pha|PHA_SNOT_13704	Phaeospheria nodorum	OG_22
ptr|PTRG_EDU42445	Pyrenophora tritici-repentis	OG_22
ptt|PTT_EFQ93583	Pyrenophora teres	OG_22
asp|ASP_CADANIAP00005180	Aspergillus nidulans	OG_22
Plyc_ER1518|9915_g	Pyrenochaeta lycopersici	OG_22
Plyc_ER1211|8651_g	Pyrenochaeta lycopersici type 2	OG_22
neu|NEU_EFNCRP00000004323	Neurospora crassa	OG_22
Plyc_ER1518|3016_g	Pyrenochaeta lycopersici	OG_22
Plyc_ER1211|10356_g	Pyrenochaeta lycopersici type 2	OG_22
col|COL_CCF40590	Colletothricum higghisianum	OG_22
lep|LEP_CBX98369	Leptosphaeria maculans	OG_22
ptr|PTRG_EDU44340	Pyrenophora tritici-repentis	OG_22
ptr|PTRG_EDU49159	Pyrenophora tritici-repentis	OG_22
Plyc_ER1518|7398_g	Pyrenochaeta lycopersici	OG_22
lep|LEP_CBX90714	Leptosphaeria maculans	OG_22
neu|NEU_EFNCRP00000005812	Neurospora crassa	OG_22
pha|PHA_SNOT_12698	Phaeospheria nodorum	OG_22
pha|PHA_SNOT_14200	Phaeospheria nodorum	OG_22
fus|FUS_FOXG_04242P0	Fusarium oxysporum sp. lycopersici	OG_22
pha|PHA_SNOT_06721	Phaeospheria nodorum	OG_22
ptt|PTT_EFQ90132	Pyrenophora teres	OG_22
fus|FUS_FOXG_05692P0	Fusarium oxysporum sp. lycopersici	OG_22
neu|NEU_EFNCRP00000002986	Neurospora crassa	OG_22
neu|NEU_EFNCRP00000008912	Neurospora crassa	OG_22
ptr|PTRG_EDU40339	Pyrenophora tritici-repentis	OG_22
asp|ASP_CADANIAP00007573	Aspergillus nidulans	OG_23
asp|ASP_CADANIAP00007901	Aspergillus nidulans	OG_23
asp|ASP_CADANIAP00002503	Aspergillus nidulans	OG_23
asp|ASP_CADANIAP00000862	Aspergillus nidulans	OG_23
asp|ASP_CADANIAP00006532	Aspergillus nidulans	OG_23
col|COL_CCF34485	Colletothricum higghisianum	OG_23
col|COL_CCF32957	Colletothricum higghisianum	OG_23
col|COL_CCF35577	Colletothricum higghisianum	OG_23
col|COL_CCF32903	Colletothricum higghisianum	OG_23
col|COL_CCF37025	Colletothricum higghisianum	OG_23
fus|FUS_FOXG_09082P0	Fusarium oxysporum sp. lycopersici	OG_23
fus|FUS_FOXG_09320P0	Fusarium oxysporum sp. lycopersici	OG_23
fus|FUS_FOXG_00990P0	Fusarium oxysporum sp. lycopersici	OG_23
fus|FUS_FOXG_01579P0	Fusarium oxysporum sp. lycopersici	OG_23
fus|FUS_FOXG_17424P0	Fusarium oxysporum sp. lycopersici	OG_23
lep|LEP_CBY01084	Leptosphaeria maculans	OG_23
lep|LEP_CBY01105	Leptosphaeria maculans	OG_23
neu|NEU_EFNCRP00000003488	Neurospora crassa	OG_23
neu|NEU_EFNCRP00000003782	Neurospora crassa	OG_23
neu|NEU_EFNCRP00000006445	Neurospora crassa	OG_23
neu|NEU_EFNCRP00000008985	Neurospora crassa	OG_23
neu|NEU_EFNCRP00000009564	Neurospora crassa	OG_23
blu|BLU_CCU77399	Blumeria graminis	OG_23
ptr|PTRG_EDU40515	Pyrenophora tritici-repentis	OG_23
Plyc_ER1211|13299_g	Pyrenochaeta lycopersici type 2	OG_23
blu|BLU_CCU77293	Blumeria graminis	OG_23
lep|LEP_CBX97089	Leptosphaeria maculans	OG_23
pha|PHA_SNOT_03688	Phaeospheria nodorum	OG_23
pha|PHA_SNOT_09278	Phaeospheria nodorum	OG_23
pha|PHA_SNOT_09336	Phaeospheria nodorum	OG_23
ptr|PTRG_EDU40488	Pyrenophora tritici-repentis	OG_23
ptt|PTT_EFQ86044	Pyrenophora teres	OG_23
ptt|PTT_EFQ88198	Pyrenophora teres	OG_23
Plyc_ER1211|8018_g	Pyrenochaeta lycopersici type 2	OG_23
blu|BLU_CCU76035	Blumeria graminis	OG_23
blu|BLU_CCU76036	Blumeria graminis	OG_23
ptr|PTRG_EDU45517	Pyrenophora tritici-repentis	OG_23
ptt|PTT_EFQ89526	Pyrenophora teres	OG_23
asp|ASP_CADANIAP00008731	Aspergillus nidulans	OG_24
asp|ASP_CADANIAP00003113	Aspergillus nidulans	OG_24
asp|ASP_CADANIAP00007009	Aspergillus nidulans	OG_24
blu|BLU_CCU75862	Blumeria graminis	OG_24
blu|BLU_CCU75955	Blumeria graminis	OG_24
blu|BLU_CCU81740	Blumeria graminis	OG_24
blu|BLU_CCU76937	Blumeria graminis	OG_24
col|COL_CCF40346	Colletothricum higghisianum	OG_24
col|COL_CCF37328	Colletothricum higghisianum	OG_24
col|COL_CCF32860	Colletothricum higghisianum	OG_24
col|COL_CCF42506	Colletothricum higghisianum	OG_24
fus|FUS_FOXG_00795P0	Fusarium oxysporum sp. lycopersici	OG_24
fus|FUS_FOXG_00893P0	Fusarium oxysporum sp. lycopersici	OG_24
fus|FUS_FOXG_06163P0	Fusarium oxysporum sp. lycopersici	OG_24
fus|FUS_FOXG_08555P0	Fusarium oxysporum sp. lycopersici	OG_24
lep|LEP_CBX90786	Leptosphaeria maculans	OG_24
lep|LEP_CBX96217	Leptosphaeria maculans	OG_24
lep|LEP_CBY01779	Leptosphaeria maculans	OG_24
lep|LEP_CBX95501	Leptosphaeria maculans	OG_24
neu|NEU_EFNCRP00000001164	Neurospora crassa	OG_24
neu|NEU_EFNCRP00000009412	Neurospora crassa	OG_24
neu|NEU_EFNCRP00000003679	Neurospora crassa	OG_24
neu|NEU_EFNCRP00000004025	Neurospora crassa	OG_24
ptr|PTRG_EDU44306	Pyrenophora tritici-repentis	OG_24
ptr|PTRG_EDU49524	Pyrenophora tritici-repentis	OG_24
ptr|PTRG_EDU45187	Pyrenophora tritici-repentis	OG_24
ptr|PTRG_EDU50773	Pyrenophora tritici-repentis	OG_24
ptt|PTT_EFQ90348	Pyrenophora teres	OG_24
ptt|PTT_EFQ91417	Pyrenophora teres	OG_24
ptt|PTT_EFQ86347	Pyrenophora teres	OG_24
asp|ASP_CADANIAP00008011	Aspergillus nidulans	OG_24
pha|PHA_SNOT_04404	Phaeospheria nodorum	OG_24
asp|ASP_CADANIAP00008012	Aspergillus nidulans	OG_24
ptt|PTT_EFQ93508	Pyrenophora teres	OG_24
Plyc_ER1518|13797_g	Pyrenochaeta lycopersici	OG_24
pha|PHA_SNOT_13583	Phaeospheria nodorum	OG_24
pha|PHA_SNOT_14322	Phaeospheria nodorum	OG_24
Plyc_ER1518|7528_g	Pyrenochaeta lycopersici	OG_24
asp|ASP_CADANIAP00003895	Aspergillus nidulans	OG_25
asp|ASP_CADANIAP00001383	Aspergillus nidulans	OG_25
asp|ASP_CADANIAP00002743	Aspergillus nidulans	OG_25
asp|ASP_CADANIAP00000984	Aspergillus nidulans	OG_25
asp|ASP_CADANIAP00004185	Aspergillus nidulans	OG_25
col|COL_CCF44599	Colletothricum higghisianum	OG_25
col|COL_CCF45132	Colletothricum higghisianum	OG_25
col|COL_CCF33747	Colletothricum higghisianum	OG_25
col|COL_CCF34829	Colletothricum higghisianum	OG_25
col|COL_CCF45895	Colletothricum higghisianum	OG_25
col|COL_CCF45582	Colletothricum higghisianum	OG_25
col|COL_CCF34126	Colletothricum higghisianum	OG_25
col|COL_CCF42960	Colletothricum higghisianum	OG_25
col|COL_CCF41961	Colletothricum higghisianum	OG_25
col|COL_CCF33956	Colletothricum higghisianum	OG_25
fus|FUS_FOXG_13025P0	Fusarium oxysporum sp. lycopersici	OG_25
fus|FUS_FOXG_04142P0	Fusarium oxysporum sp. lycopersici	OG_25
fus|FUS_FOXG_04493P0	Fusarium oxysporum sp. lycopersici	OG_25
fus|FUS_FOXG_08360P0	Fusarium oxysporum sp. lycopersici	OG_25
pha|PHA_SNOT_14100	Phaeospheria nodorum	OG_25
pha|PHA_SNOT_14836	Phaeospheria nodorum	OG_25
pha|PHA_SNOT_09087	Phaeospheria nodorum	OG_25
ptr|PTRG_EDU41237	Pyrenophora tritici-repentis	OG_25
ptr|PTRG_EDU42146	Pyrenophora tritici-repentis	OG_25
ptt|PTT_EFQ92074	Pyrenophora teres	OG_25
ptt|PTT_EFQ92172	Pyrenophora teres	OG_25
Plyc_ER1211|13367_g	Pyrenochaeta lycopersici type 2	OG_25
lep|LEP_CBY02115	Leptosphaeria maculans	OG_25
neu|NEU_EFNCRP00000003371	Neurospora crassa	OG_25
Plyc_ER1518|7698_g	Pyrenochaeta lycopersici	OG_25
neu|NEU_EFNCRP00000001218	Neurospora crassa	OG_25
col|COL_CCF35819	Colletothricum higghisianum	OG_25
col|COL_CCF34421	Colletothricum higghisianum	OG_25
fus|FUS_FOXG_10860P0	Fusarium oxysporum sp. lycopersici	OG_25
pha|PHA_SNOT_00757	Phaeospheria nodorum	OG_25
fus|FUS_FOXG_08621P0	Fusarium oxysporum sp. lycopersici	OG_25
fus|FUS_FOXG_08622P0	Fusarium oxysporum sp. lycopersici	OG_25
pha|PHA_SNOT_01112	Phaeospheria nodorum	OG_25
asp|ASP_CADANIAP00005240	Aspergillus nidulans	OG_26
asp|ASP_CADANIAP00007116	Aspergillus nidulans	OG_26
col|COL_CCF45413	Colletothricum higghisianum	OG_26
col|COL_CCF41532	Colletothricum higghisianum	OG_26
col|COL_CCF39857	Colletothricum higghisianum	OG_26
fus|FUS_FOXG_08943P0	Fusarium oxysporum sp. lycopersici	OG_26
fus|FUS_FOXG_12672P0	Fusarium oxysporum sp. lycopersici	OG_26
fus|FUS_FOXG_09915P0	Fusarium oxysporum sp. lycopersici	OG_26
fus|FUS_FOXG_04866P0	Fusarium oxysporum sp. lycopersici	OG_26
fus|FUS_FOXG_10778P0	Fusarium oxysporum sp. lycopersici	OG_26
fus|FUS_FOXG_13215P0	Fusarium oxysporum sp. lycopersici	OG_26
lep|LEP_CBX90414	Leptosphaeria maculans	OG_26
lep|LEP_CBX91036	Leptosphaeria maculans	OG_26
ptr|PTRG_EDU46568	Pyrenophora tritici-repentis	OG_26
ptr|PTRG_EDU41749	Pyrenophora tritici-repentis	OG_26
ptr|PTRG_EDU44856	Pyrenophora tritici-repentis	OG_26
ptt|PTT_EFQ96461	Pyrenophora teres	OG_26
ptt|PTT_EFQ91009	Pyrenophora teres	OG_26
ptt|PTT_EFQ96259	Pyrenophora teres	OG_26
ptt|PTT_EFQ94346	Pyrenophora teres	OG_26
Plyc_ER1518|3822_g	Pyrenochaeta lycopersici	OG_26
blu|BLU_CCU75413	Blumeria graminis	OG_26
neu|NEU_EFNCRP00000006323	Neurospora crassa	OG_26
pha|PHA_SNOT_07976	Phaeospheria nodorum	OG_26
asp|ASP_CADANIAP00000089	Aspergillus nidulans	OG_26
Plyc_ER1211|12766_g	Pyrenochaeta lycopersici type 2	OG_26
neu|NEU_EFNCRP00000008787	Neurospora crassa	OG_26
pha|PHA_SNOT_01128	Phaeospheria nodorum	OG_26
pha|PHA_SNOT_03926	Phaeospheria nodorum	OG_26
Plyc_ER1211|12501_g	Pyrenochaeta lycopersici type 2	OG_26
lep|LEP_CBX98929	Leptosphaeria maculans	OG_26
pha|PHA_SNOT_00613	Phaeospheria nodorum	OG_26
ptr|PTRG_EDU44143	Pyrenophora tritici-repentis	OG_26
ptt|PTT_EFQ85487	Pyrenophora teres	OG_26
lep|LEP_CBX96904	Leptosphaeria maculans	OG_26
col|COL_CCF35828	Colletothricum higghisianum	OG_26
pha|PHA_SNOT_02890	Phaeospheria nodorum	OG_26
ptr|PTRG_EDU44137	Pyrenophora tritici-repentis	OG_27
ptr|PTRG_EDU42710	Pyrenophora tritici-repentis	OG_27
ptr|PTRG_EDU42719	Pyrenophora tritici-repentis	OG_27
ptr|PTRG_EDU42749	Pyrenophora tritici-repentis	OG_27
ptr|PTRG_EDU46252	Pyrenophora tritici-repentis	OG_27
ptr|PTRG_EDU46728	Pyrenophora tritici-repentis	OG_27
ptr|PTRG_EDU47586	Pyrenophora tritici-repentis	OG_27
ptr|PTRG_EDU48828	Pyrenophora tritici-repentis	OG_27
ptr|PTRG_EDU48957	Pyrenophora tritici-repentis	OG_27
ptr|PTRG_EDU47750	Pyrenophora tritici-repentis	OG_27
ptr|PTRG_EDU44284	Pyrenophora tritici-repentis	OG_27
ptr|PTRG_EDU48087	Pyrenophora tritici-repentis	OG_27
ptr|PTRG_EDU51045	Pyrenophora tritici-repentis	OG_27
ptr|PTRG_EDU44533	Pyrenophora tritici-repentis	OG_27
ptr|PTRG_EDU43288	Pyrenophora tritici-repentis	OG_27
ptr|PTRG_EDU43460	Pyrenophora tritici-repentis	OG_27
ptr|PTRG_EDU49205	Pyrenophora tritici-repentis	OG_27
ptr|PTRG_EDU43886	Pyrenophora tritici-repentis	OG_27
ptr|PTRG_EDU49484	Pyrenophora tritici-repentis	OG_27
ptr|PTRG_EDU49706	Pyrenophora tritici-repentis	OG_27
ptr|PTRG_EDU46181	Pyrenophora tritici-repentis	OG_27
ptr|PTRG_EDU45189	Pyrenophora tritici-repentis	OG_27
ptr|PTRG_EDU45290	Pyrenophora tritici-repentis	OG_27
ptr|PTRG_EDU45411	Pyrenophora tritici-repentis	OG_27
ptr|PTRG_EDU45635	Pyrenophora tritici-repentis	OG_27
ptr|PTRG_EDU46149	Pyrenophora tritici-repentis	OG_27
ptr|PTRG_EDU42782	Pyrenophora tritici-repentis	OG_27
ptr|PTRG_EDU43128	Pyrenophora tritici-repentis	OG_27
ptr|PTRG_EDU50168	Pyrenophora tritici-repentis	OG_27
ptr|PTRG_EDU46039	Pyrenophora tritici-repentis	OG_27
ptr|PTRG_EDU50299	Pyrenophora tritici-repentis	OG_27
ptr|PTRG_EDU39472	Pyrenophora tritici-repentis	OG_27
ptr|PTRG_EDU39816	Pyrenophora tritici-repentis	OG_27
ptr|PTRG_EDU40600	Pyrenophora tritici-repentis	OG_27
ptr|PTRG_EDU41162	Pyrenophora tritici-repentis	OG_27
ptr|PTRG_EDU41709	Pyrenophora tritici-repentis	OG_27
ptr|PTRG_EDU42534	Pyrenophora tritici-repentis	OG_27
blu|BLU_CCU75671	Blumeria graminis	OG_28
blu|BLU_CCU75838	Blumeria graminis	OG_28
blu|BLU_CCU76838	Blumeria graminis	OG_28
blu|BLU_CCU75988	Blumeria graminis	OG_28
blu|BLU_CCU75991	Blumeria graminis	OG_28
blu|BLU_CCU75994	Blumeria graminis	OG_28
blu|BLU_CCU76010	Blumeria graminis	OG_28
blu|BLU_CCU83284	Blumeria graminis	OG_28
blu|BLU_CCU83208	Blumeria graminis	OG_28
blu|BLU_CCU79651	Blumeria graminis	OG_28
blu|BLU_CCU83224	Blumeria graminis	OG_28
blu|BLU_CCU74325	Blumeria graminis	OG_28
blu|BLU_CCU74334	Blumeria graminis	OG_28
blu|BLU_CCU74340	Blumeria graminis	OG_28
blu|BLU_CCU82152	Blumeria graminis	OG_28
blu|BLU_CCU83158	Blumeria graminis	OG_28
blu|BLU_CCU83159	Blumeria graminis	OG_28
blu|BLU_CCU82157	Blumeria graminis	OG_28
blu|BLU_CCU82158	Blumeria graminis	OG_28
blu|BLU_CCU82159	Blumeria graminis	OG_28
blu|BLU_CCU76489	Blumeria graminis	OG_28
blu|BLU_CCU82176	Blumeria graminis	OG_28
blu|BLU_CCU77797	Blumeria graminis	OG_28
blu|BLU_CCU75836	Blumeria graminis	OG_28
blu|BLU_CCU75837	Blumeria graminis	OG_28
blu|BLU_CCU74274	Blumeria graminis	OG_28
blu|BLU_CCU74314	Blumeria graminis	OG_28
blu|BLU_CCU76834	Blumeria graminis	OG_28
blu|BLU_CCU75989	Blumeria graminis	OG_28
blu|BLU_CCU79680	Blumeria graminis	OG_28
blu|BLU_CCU79713	Blumeria graminis	OG_28
blu|BLU_CCU76008	Blumeria graminis	OG_28
blu|BLU_CCU83192	Blumeria graminis	OG_28
blu|BLU_CCU83193	Blumeria graminis	OG_28
blu|BLU_CCU83160	Blumeria graminis	OG_28
blu|BLU_CCU79644	Blumeria graminis	OG_28
asp|ASP_CADANIAP00010269	Aspergillus nidulans	OG_29
[truncated: 63,535 more rows]
